# Supplementary material
Source: ML conference proceedings conference paper supplement (https://openreview.net/forum?id=QySD5r7PeE)
Supplement: supplementary_material [file attachment]

# A Pseudo-Metric between Probability Distributions based on Depth-Trimmed Regions

Anonymous authors

Paper under double-blind review

## Abstract

The design of a metric between probability distributions is a longstanding problem motivated by numerous applications in machine learning. Focusing on continuous probability distributions in the Euclidean space  $\mathbb{R}^d$ , we introduce a novel pseudo-metric between probability distributions by leveraging the extension of univariate quantiles to multivariate spaces. Data depth is a nonparametric statistical tool that measures the centrality of any element  $x \in \mathbb{R}^d$  with respect to (w.r.t.) a probability distribution or a dataset. It is a natural median-oriented extension of the cumulative distribution function (cdf) to the multivariate case. Thus, its upper-level sets—the depth-trimmed regions—give rise to a definition of multivariate quantiles. The new pseudo-metric relies on the average of the Hausdorff distance between the depth-based quantile regions for each distribution. Its good behavior regarding major transformation groups, as well as its ability to factor out translations, are depicted. Robustness, an appealing feature of this pseudo-metric, is studied through the finite sample breakdown point. Moreover, we propose an efficient approximation method with linear time complexity w.r.t. the size of the dataset and its dimension. The quality of this approximation and the performance of the proposed approach are illustrated in numerical experiments.

## 1 Introduction

Metrics or pseudo-metrics between probability distributions have attracted a long-standing interest in information theory (Kullback, 1959; Rényi, 1961; Csiszàr, 1963; Stummer & Vajda, 2012), probability theory and statistics (Billingsley, 1999; Sriperumbudur et al., 2012; Panaretos & Zemel, 2019; Rachev, 1991). While they serve many purposes in machine learning (Cha & Srihari, 2002; MacKay, 2003), they are of crucial importance in automatic evaluation of natural language generation (see e.g. Kusner et al., 2015; Zhang et al., 2019), especially when leveraging deep contextualized embeddings such as the popular BERT (Devlin et al., 2018). Yet designing a measure to compare two probability distributions is a challenging research field. This is certainly due to the inherent difficulty in capturing in a single measure typical desired properties such as: (i) metric or pseudo metric properties, (ii) invariance under specific geometric transformations, (iii) efficient computation, and (iv) robustness to contamination.

One can find in the literature a vast collection of discrepancies between probability distributions that rely on different principles. The  $f$ -divergences (Csiszàr, 1963) are defined as the weighted average by a well-chosen function  $f$  of the odds ratio between the two distributions. They are widely used in statistical inference but are, by design, ill-defined when the supports of both distributions do not overlap, which is a significant limitation in many applications. IPMs (Sriperumbudur et al., 2012) are based on a variational definition of the metric, i.e. the maximum difference in expectation for both distributions calculated over a class of measurable functions and give rise to various metrics (Maximum Mean Discrepancy (MMD), Dudley’s metric,  $L_1$ -Wassertein Distance) depending on the choice of this class. However, except in the case of MMD, which enjoys a closed-form solution, the variational definition raises issues in computation. From the side of Optimal transport (OT) (see Villani, 2003; Peyré & Cuturi, 2019), the  $L_p$ -Wasserstein distance is based on a ground metric able to take into account the geometry of the space on which the distributions are defined. Its ability to handle non-overlapping support and appealing theoretical properties make OT a powerful tool, mainly when applied to generative models (Arjovsky et al., 2017), domain adaptation (Courty et al., 2014; Courty

et al., 2017), realign datasets in natural sciences (Janati et al., 2019; Schiebinger et al., 2019) or automatic text evaluation (Zhao et al., 2019; Colombo et al., 2021a).

In this work, we adopt another angle. Focusing on continuous probability distributions in the Euclidean space  $\mathbb{R}^d$ , we propose to consider a new metric between probability distributions by leveraging the extension of univariate quantiles to multivariate spaces. The notion of quantile function is an interesting ground to build a comparison between two probability measures as illustrated by the closed-form of the Wasserstein distance defined over  $\mathbb{R}$ . However, given the lack of natural ordering on  $\mathbb{R}^d$  as soon as  $d > 1$ , extending the concept of univariate quantiles to the multivariate case raises a real challenge. Many extensions have been proposed in the literature, such as minimum volume sets (Einhmahl & Mason, 1992), spatial quantiles (Koltchinskii & Dudley, 1996) or data depth (Tukey, 1975). The latter offers different ways of ordering multivariate data regarding a probability distribution. Precisely, *data depths* are non-parametric statistics that determine the centrality of any element  $x \in \mathbb{R}^d$  w.r.t. a probability measure. They provide a multivariate ordering based on topological properties of the distribution, allowing it to be characterized by its location, scale or shape (see, e.g. Mosler, 2013 or Chapter 2 of Staerman, 2022 for a review). Several data depths were subsequently proposed, such as convex hull peeling depth (Barnett, 1976), simplicial depth (Liu, 1990), Oja depth (Oja, 1983) or zonoid depth (Koshevoy & Mosler, 1997) differing in their properties and applications. With a substantial body of literature devoted to its computation, recent advances allow for fast exact (Pokotylo et al., 2019) and approximate (Dyckerhoff et al., 2021) computation of several depth notions. The desirable properties of data depth, such as affine invariance, continuity w.r.t. its arguments, and robustness (Zuo & Serfling, 2000) make it an important tool in many fields. Today, in its variety of notions and applications, data depth constitutes a versatile methodology (Mosler & Mozharovskiy, 2021) that has been successfully employed in a variety of machine learning tasks such as regression (Rousseeuw & Hubert, 1999; Hallin et al., 2010), classification (Li et al., 2012; Lange et al., 2014), anomaly detection (Serfling, 2006; Rousseeuw & Hubert, 2018; Staerman et al., 2020) and clustering (Jörnsten, 2004).

This paper presents a new discrepancy measure between probability distributions, well-defined for non-overlapping supports, that leverages the interesting features of data depths. This measure is studied through the lens of the previously stated properties, yielding the contributions listed below.

### Contributions:

- A new discrepancy measure between probability distributions involving the upper-level sets of data depth is introduced. We show that this measure defines a pseudo-metric in general. Its good behavior regarding major transformation groups, as well as its ability to factor out translations, are depicted. Its robustness is investigated through the concept of finite sample breakdown point.
- An efficient approximation of the depth-trimmed regions-based pseudo-metric is proposed for convex depth functions such as halfspace and projection. This approximation relies on a nice feature of the Hausdorff distance when computed between convex bodies.
- The behavior of this algorithm regarding its parameters is studied through numerical experiments, which also highlight the by-design robustness of the depth-trimmed regions based pseudo-metric. Applications to robust clustering of images and automatic evaluation of natural language generation (NLG) show the benefits of this approach when benchmarked with state-of-the-art probability metrics.

## 2 Background on Data Depth

In this section, we recall the concept of statistical *data depth* function and its attractive theoretical properties for clarity. Here and throughout, the space of all continuous probability measures on  $\mathbb{R}^d$  with  $d \in \mathbb{N}^*$  is denoted by  $\mathcal{M}_1(\mathbb{R}^d)$ . By  $g_\#$  we denote the push-forward operator of the function  $g$ . Introduced by Tukey (1975), the concept of data depth initially extends the notion of median to the multivariate setting. In other words, it measures the centrality of any element  $x \in \mathbb{R}^d$  regarding a probability distribution (respectively, a dataset). Formally, a data depth is defined as follows:

$$D : \mathbb{R}^d \times \mathcal{M}_1(\mathbb{R}^d) \longrightarrow [0, 1],$$

$$(x, \rho) \longmapsto D(x, \rho).$$
(1)

We denote by  $D(x, \rho)$  (or  $D_\rho(x)$  for brevity) the depth of  $x \in \mathbb{R}^d$  w.r.t.  $\rho \in \mathcal{M}_1(\mathbb{R}^d)$ . The higher  $D(x, \rho)$ , the deeper it is in  $\rho$ . The depth-induced median of  $\rho$  is then defined by the set attaining  $\sup_{x \in \mathbb{R}^d} D(x, \rho)$ . Since data depth naturally and in a nonparametric way defines a pre-order on  $\mathbb{R}^d$  w.r.t. a probability distribution, it can be seen as a centrality-based alternative to the cumulative distribution function (cdf) for multivariate data. For any  $\alpha \in [0, 1]$ , the associated  $\alpha$ -depth region of a depth function is defined as its upper-level set:

$$D_\rho^\alpha = \{x \in \mathbb{R}^d, D_\rho(x) \geq \alpha\}.$$

It follows that depth regions are nested, i.e.  $D_\rho^{\alpha'} \subseteq D_\rho^\alpha$  for any  $\alpha < \alpha'$ . These depth regions generalize the notion of quantiles to a multivariate distribution.

A depth function's relevance to capturing information about a distribution relies on the statistical properties it satisfies. Such properties have been thoroughly investigated in [Liu \(1990\)](#); [Zuo & Serfling \(2000\)](#) and [Dyckerhoff \(2004\)](#) with slightly different sets of axioms (or postulates) to be satisfied by a proper depth function. In this paper, we restrict to *convex depth functions* ([Dyckerhoff, 2004](#)) mainly motivated by recent algorithmic developments including theoretical results ([Nagy et al., 2020](#)) as well as implementation guidelines ([Dyckerhoff et al., 2021](#)).

The general formulation (1) opens the door to various possible definitions. While these differ in theoretical and practically related properties such as robustness or computational complexity (see [Mosler & Mozharovskiy, 2021](#) for a detailed discussion), several postulates have been developed throughout the recent decades the “good” depth function should satisfy. Formally, a function  $D$  is called a *convex depth function* if it satisfies the following postulates:

**D1** (AFFINE INVARIANCE)  $D(g(x), g_\# \rho) = D(x, \rho)$  holds for  $g : x \in \mathbb{R}^d \mapsto Ax + b$  with any non-singular matrix  $A \in \mathbb{R}^{d \times d}$  and any vector  $b \in \mathbb{R}^d$ .

**D2** (VANISHING AT INFINITY)  $\lim_{\|x\| \rightarrow \infty} D_\rho(x) = 0$ .

**D3** (UPPER SEMICONTINUITY)  $\{x \in \mathbb{R}^d \mid D_\rho(x) < \alpha\}$  is an open set for every  $\alpha \in (0, 1]$ .

**D4** (QUASICONCAVITY) For every  $\lambda \in [0, 1]$  and  $x, y \in \mathbb{R}^d$ ,  $D_\rho(\lambda x + (1 - \lambda)y) \geq \min\{D_\rho(x), D_\rho(y)\}$ .

While **(D1)** is useful in applications providing independence w.r.t. measurement units and coordinate system, **(D2)** and **(D3)** appear as natural properties since data depth is a (center-outward) generalization of cdf. Limit values vanish due to median-oriented construction. **(D4)** allows to preserve the original center-outward ordering goal of data depth and induces convexity of the depth regions. Furthermore, it is easy to see that **(D1–D4)** respectively yield properties of affine equivariance, boundedness, closedness and convexity of the central regions  $D_\rho^\alpha$  ([Dyckerhoff, 2004](#)). Thanks to **(D2–D4)**, if  $\alpha > 0$ , non-empty regions associated to convex depth functions are convex bodies (compact convex set in  $\mathbb{R}^d$ ).

Below we recall two convex depth functions satisfying **(D1–D4)** that will be used throughout the paper: the halfspace depth ([Tukey, 1975](#)) and the projection depth ([Liu, 1992](#)), which are probably the most studied in the literature. For this, let  $\mathbb{S}^{d-1}$  be the unit sphere in  $\mathbb{R}^d$  and  $X$  a random variable defined on a certain probability space  $(\Omega, \mathcal{A}, \mathbb{P})$  that takes values in  $\mathcal{X} \subset \mathbb{R}^d$  following distribution  $\rho$ . The halfspace depth of a given  $x \in \mathbb{R}^d$  w.r.t.  $\rho$  is defined as the smallest probability mass that can be contained in a closed halfspace containing  $x$ :

$$HD_\rho(x) = \inf_{u \in \mathbb{S}^{d-1}} \mathbb{P}(\langle u, X \rangle \leq \langle u, x \rangle).$$

Projection depth, being a monotone transform of the Stahel-Donoho outlyingness (Donoho & Gasko, 1992; Stahel, 1981), is defined as follows:

$$PD_\rho(x) = \left( 1 + \sup_{u \in \mathbb{S}^{d-1}} \frac{|\langle u, x \rangle - \text{med}(\langle u, X \rangle)|}{\text{MAD}(\langle u, X \rangle)} \right)^{-1},$$

where med and MAD stand for the univariate median and median absolute deviation from the median, respectively.

**Remark 2.1.** *Data depth functions have connections with the density function in particular cases. Indeed, for elliptical distributions, the level sets of any data depth satisfying (D1–D4) are concentric ellipsoids with the same center, and orientation as the density level sets (Liu & Singh, 1993). The density is a local measure assigning the score of an element as the probability mass in an infinitesimal neighborhood. In contrast, data depths are global measures of ordering taking into account the whole distribution to assign a score to an element and are thus not equivalent to the density for general distributions. However, they provide interesting alternatives in many applications, such as anomaly detection (see e.g. Staerman et al., 2021b). For example, the density will assign a zero score to every  $x \in \mathbb{R}^d$  far from a concentrated group of observations regardless of the distance. At the same time, the projection depth described above will be able to rank these “outliers” depending on how it moves away from them.*

### 3 A Pseudo-Metric based on Depth-Trimmed Regions

In this section, we introduce the depth-based pseudo-metric and study its properties. We consider depth regions possessing the same probability mass to compare those from different probability distributions fairly. Following Paidaveine & Bever (2013), we denote by  $\alpha : (\beta, \rho) \in [0, 1] \times \mathcal{M}_1(\mathbb{R}^d) \mapsto \alpha(\beta, \rho) \in [0, 1]$  the highest level such that the probability mass of the depth-trimmed region at this level is at least  $\beta$ . Precisely, for any pair  $(\beta, \rho) \in [0, 1] \times \mathcal{M}_1(\mathbb{R}^d)$ :

$$\alpha(\beta, \rho) = \sup\{\gamma \in [0, 1] : \rho(D_\rho^\gamma) > \beta\}. \quad (2)$$

In the remainder of this paper, when the quantity  $\alpha(\beta, \rho)$  will be associated with depth regions of  $\rho$ , the second argument of the function  $\alpha(\cdot, \cdot)$  will be omitted, for notation simplicity. It is worth mentioning that  $D_\rho^{\alpha(\beta')}$   $\subseteq$   $D_\rho^{\alpha(\beta)}$  for any  $\beta > \beta'$ , since  $\beta \mapsto \alpha(\beta, \rho)$  is a monotone decreasing function. Thus,  $D_\rho^{\alpha(\beta)}$  is the smallest depth region with probability larger than or equal to  $\beta$  and can be defined in an identical way as:

$$D_\rho^{\alpha(\beta)} = \bigcap_{\gamma \in \Gamma_\rho(\beta)} D_\rho^\gamma,$$

where  $\Gamma_\rho(\beta) = \{\zeta \in [0, 1] : \rho(D_\rho^\zeta) > \beta\}$ . The strict inequalities in (2) and in the definition of  $\Gamma_\rho(\beta)$  eliminate cases where the supremum does not exist. Indeed, when  $\beta = 0$ , the depth region is then an infinitesimal set with a probability higher than zero. To the best of our knowledge, the supremum exists (without necessarily being unique) in the case of the halfspace depth (Rousseeuw & Rutz, 1999) and the projection depth (Zuo, 2003) under mild assumptions. The set  $\{D_\rho^{\alpha(\beta)}, \beta \in [0, 1 - \varepsilon], \varepsilon \in (0, 1]\}$  where each region probability mass is equal to  $\beta$  then defines quantile regions of  $\rho$ .

Let  $\mu, \nu$  be two absolutely continuous probability measures (w.r.t. the Lebesgue measure) on  $\mathcal{X}, \mathcal{Y} \subset \mathbb{R}^d$  respectively. Denote by  $d_{\mathcal{H}}(A, B)$  the Hausdorff distance between the sets  $A$  and  $B$ . The pseudo-metric between probability distributions  $\mu$  and  $\nu$  based on the depth-trimmed regions is defined as follows.

**Definition 3.1.** *Let  $\varepsilon \in (0, 1]$  and  $p \in (0, \infty)$ , for all pairs  $(\mu, \nu)$  in  $\mathcal{M}_1(\mathcal{X}) \times \mathcal{M}_1(\mathcal{Y})$ , the depth-trimmed regions  $(DR_{p,\varepsilon})$  discrepancy measure between  $\mu$  and  $\nu$  is defined as*

$$DR_{p,\varepsilon}^p(\mu, \nu) = \int_0^{1-\varepsilon} d_{\mathcal{H}}\left(D_\mu^{\alpha(\beta)}, D_\nu^{\alpha(\beta)}\right)^p d\beta. \quad (3)$$

Our discrepancy measure relies on the Hausdorff distance averaged over depth-trimmed regions with the same probability mass w.r.t. each distribution. Properties **(D2–D3)** ensure that for every  $0 \leq \beta < 1$ ,  $D_\mu^{\alpha(\beta)}$  is a non-empty compact subset of  $\mathbb{R}^d$  leading to a well-defined discrepancy measure. Observe that the parameter  $\varepsilon$  can be considered as a robustness tuning parameter. Indeed, choosing higher  $\varepsilon$  amounts to ignore the larger upper-level sets of data depth function, i.e. the tails of the distributions, see Sections 3.2 and 5.1.

**Remark 3.2.** *Data depths provide robustness to (3) together with the  $\varepsilon$ -trimming. Indeed, data depths such as the three previously introduced in Section 2 exhibit attractive robustness properties. The asymptotic breakdown point of the halfspace median is higher than  $1/(d+1)$ . In contrast, the projection median is known to have a breakdown point equal to  $1/2$  (Donoho & Gasko, 1992; Ramsay et al., 2019).*

**Remark 3.3.** *When  $d = 1$ , the  $L_p$ -Wasserstein distance enjoys an explicit expression involving quantile and distribution functions. Let  $X^1 \sim \mu_1$ ,  $Y^1 \sim \nu_1$  be two random variables where  $\mu_1, \nu_1$  are univariate probability distributions. Denoting by  $F_{X^1}^{-1}$  the quantile function of  $X^1$ , the  $L_p$ -Wasserstein distance can be written as*

$$W_p^p(\mu_1, \nu_1) = \int_0^1 |F_{X^1}^{-1}(q) - F_{Y^1}^{-1}(q)|^p dq. \quad (4)$$

Since data depth and its central regions are extensions of cdf and quantiles to dimension  $d > 1$ ,  $DR_{p,\varepsilon}$  is then a possible (center-outward) generalization of (4) to higher dimensions. When  $DR_{p,\varepsilon}$  is associated with the halfspace depth, a simple calculus (see Lemma A.3 in the Appendix for mathematical details) leads to

$$DR_{p,\varepsilon}^p(\mu_1, \nu_1) = 2 \int_{\varepsilon/2}^{1/2} \max \left\{ |F_{X^1}^{-1}(q) - F_{Y^1}^{-1}(q)|^p, |F_{X^1}^{-1}(1-q) - F_{Y^1}^{-1}(1-q)|^p \right\} dq.$$

Thus,  $W_p^p(\mu_1, \nu_1) \leq \lim_{\varepsilon \rightarrow 0} DR_{p,\varepsilon}^p(\mu_1, \nu_1)$  in general where the equality holds for symmetric distributions.

### 3.1 Metric Properties

We now investigate to which extent the proposed discrepancy measure satisfies the metric axioms. As a first go, we show that  $DR_{p,\varepsilon}$  fulfills most conditions. However, it does not define distance in general.

**Proposition 3.4** (METRIC PROPERTIES). *For any convex data depth,  $DR_{p,\varepsilon}$  is positive, symmetric and satisfies triangular inequality but the entailment  $DR_{p,\varepsilon}(\mu, \nu) = 0 \implies \mu = \nu$  does not hold in general.*

Thus,  $DR_{p,\varepsilon}$  defines a pseudo-metric rather than a distance. Based on distance, the proposed discrepancy measure preserves isometry invariance, as stated in the following proposition.

**Proposition 3.5** (ISOMETRY INVARIANCE). *Let  $A \in \mathbb{R}^{d \times d}$  be a non-singular matrix and  $b \in \mathbb{R}^d$ . Define the isometry mapping  $g : x \in \mathbb{R}^d \mapsto Ax + b$  with  $AA^\top = I_d$ , then it holds:*

$$DR_{p,\varepsilon}(g_\# \mu, g_\# \nu) = DR_{p,\varepsilon}(\mu, \nu),$$

where  $g_\# \mu$  is the push-forward of  $\mu$  by  $g$ . In particular, it ensures invariance of  $DR_{p,\varepsilon}$  under translations and rotations.

Although formulas (3) and (4) are based on the same spirit, there are no apparent reasons why the proposed pseudo-metric should have the same behavior as the Wasserstein distance. It is the purpose of Proposition 3.6 to investigate the ability to factor out translations, for  $DR_{2,\varepsilon}$  associated with the halfspace depth, giving a positive answer for the case of two Gaussian distributions with equal covariance matrices.

**Proposition 3.6** (TRANSLATION CHARACTERIZATION). *Consider  $X, Y$  two random variables following  $\mu \in \mathcal{M}_1(\mathcal{X})$  and  $\nu \in \mathcal{M}_1(\mathcal{Y})$  with expectations  $\mathbf{m}_1, \mathbf{m}_2$  and variance-covariance matrices  $\Sigma_1, \Sigma_2$  respectively. Denoting by  $\mu^*, \nu^*$  the centered versions of  $\mu, \nu$ , it holds:*

$$\left| DR_{2,\varepsilon}^2(\mu, \nu) - DR_{2,\varepsilon}^2(\mu^*, \nu^*) - \|\mathbf{m}_1 - \mathbf{m}_2\|^2 \right| \leq 2 DR_{1,\varepsilon}(\mu^*, \nu^*) \|\mathbf{m}_1 - \mathbf{m}_2\|.$$

Now, let  $\mu \sim \mathcal{N}(\mathbf{m}_1, \Sigma_1)$  and  $\nu \sim \mathcal{N}(\mathbf{m}_2, \Sigma_2)$ . Then it holds:

$$\left| DR_{1,\varepsilon}(\mu, \nu) - \|\mathbf{m}_1 - \mathbf{m}_2\| \right| \leq C_\varepsilon \sup_{u \in \mathbb{S}^{d-1}} \left| \sqrt{u^\top \Sigma_1 u} - \sqrt{u^\top \Sigma_2 u} \right|,$$

where  $C_\varepsilon = \int_0^{1-\varepsilon} |\Phi^{-1}(1 - \alpha(\beta))| d\beta$  with  $\Phi$  the cdf of the univariate standard Gaussian distribution.

Following Proposition 3.6: when  $\Sigma_1 = \Sigma_2$ , one has  $DR_{2,\varepsilon}(\mu, \nu) = DR_{1,\varepsilon}(\mu, \nu) = \|\mathbf{m}_1 - \mathbf{m}_2\|$  for any  $\mu \sim \mathcal{N}(\mathbf{m}_1, \Sigma_1)$  and  $\nu \sim \mathcal{N}(\mathbf{m}_2, \Sigma_2)$  providing a closed-form expression in the Gaussian case. This proposition shows that  $DR_{2,\varepsilon}$  is able to factor out translations in a similar way as Wasserstein distance if  $DR_{1,\varepsilon}(\mu^*, \nu^*)$  is zero. Furthermore, it is clear that if  $DR_{1,\varepsilon}(\mu^*, \nu^*) = 0$  then  $DR_{2,\varepsilon}(\mu^*, \nu^*)$  is zero too.

### 3.2 Robustness

In this part, we explore the robustness of the proposed distance, associated with the halfspace depth, given the finite sample breakdown point (BP; Donoho, 1982; Donoho & Hubert, 1983). This notion investigates the smallest contamination fraction under which the estimation breaks down in the worst case. Considering a sample  $\mathcal{S}_n = \{X_1, \dots, X_n\}$  composed of i.i.d. observations drawn from a distribution  $\mu$  with empirical measure  $\hat{\mu}_n = (1/n) \sum_{i=1}^n \delta_{X_i}$ , the finite sample breakdown point of  $DR_{p,\varepsilon}$  w.r.t.  $\mathcal{S}_n$ , denoted by  $BP(DR_{p,\varepsilon}, \mathcal{S}_n)$  is defined as:

$$\min \left\{ \frac{o}{n+o} : \sup_{Z_1, \dots, Z_o} DR_{p,\varepsilon}(\hat{\mu}_{n+o}, \hat{\mu}_n) = +\infty \right\},$$

where  $\hat{\mu}_{n+o} = \frac{1}{n+o} \left( \sum_{i=1}^n \delta_{X_i} + \sum_{j=1}^o \delta_{Z_j} \right)$  is the “concatenate” empirical measure between  $X_1, \dots, X_n$  and the contamination sample  $Z_1, \dots, Z_o$  with  $o \in \mathbb{N}^*$ . It is well known that the extremal regions of the halfspace depth are not robust while its central regions are rather stable under contamination (Donoho & Gasko, 1992). Fortunately, by construction, the parameter  $\varepsilon$  allows us to ignore these extremal depth regions and thus ensure the robustness of the depth-trimmed regions distance. Based on the results of Donoho & Gasko (1992) and Nagy & Dvořák (2021), the following proposition provides a lower bound on the finite sample breakdown point of  $DR_{p,\varepsilon}$ , which highlights the robustness of the proposed distance as well as its dependence on  $\varepsilon$ .

**Proposition 3.7** (BREAKDOWN POINT). *For the halfspace depth function, for any  $\beta \in [0, 1 - \varepsilon]$  such that  $\alpha(\beta, \hat{\mu}_n) < \alpha_{\max}(\hat{\mu}_n)$ , it holds:*

$$BP(DR_{p,\varepsilon}, \mathcal{S}_n) \geq \begin{cases} \frac{\lceil n\alpha(1 - \varepsilon, \hat{\mu}_n)/(1 - \alpha(1 - \varepsilon, \hat{\mu}_n)) \rceil}{n + \lceil n\alpha(1 - \varepsilon, \hat{\mu}_n)/(1 - \alpha(1 - \varepsilon, \hat{\mu}_n)) \rceil} & \text{if } \alpha(1 - \varepsilon, \hat{\mu}_n) \leq \frac{\alpha_{\max}(\hat{\mu}_n)}{1 + \alpha_{\max}(\hat{\mu}_n)}, \\ \frac{\alpha_{\max}(\hat{\mu}_n)}{1 + \alpha_{\max}(\hat{\mu}_n)} & \text{otherwise,} \end{cases}$$

where  $\alpha_{\max}(\hat{\mu}_n) = \max_{x \in \mathbb{R}^d} HD_{\hat{\mu}_n}(x)$ .

Thus, at least a proportion  $\alpha(1 - \varepsilon, \hat{\mu}_n)/(1 - \alpha(1 - \varepsilon, \hat{\mu}_n))$  of outliers must be added to break down  $DR_{p,\varepsilon}$  when considering larger regions, while central regions are robust independently of  $\varepsilon$ . For two datasets,  $DR_{p,\varepsilon}$  breaks down if depth regions for at least one of the datasets do. The breakdown point is then the minimum between the breakdown points of each dataset. However, the breakdown point considers the worst case, i.e. the supremum over all possible contaminations, and is often pessimistic. Indeed the proposed pseudo-metric can handle more outliers in certain cases, as experimentally illustrated in Section 5.1.

## 4 Efficient Approximate Computation

Exact computation of  $DR_{p,\varepsilon}$  can appear time-consuming due to the high time complexity of the algorithms that calculate depth-trimmed regions (c.f. Liu & Zuo, 2014 and Liu et al., 2019a for projection and halfspace depths,



respectively) rapidly growing with dimension. However, we design a universal approximate algorithm that achieves (log-) linear time complexity in  $n$ . Since properties **(D2–D4)** ensure that depth regions are convex bodies in  $\mathbb{R}^d$ , they can be characterized by their support functions defined by  $h_{\mathcal{K}}(u) = \sup\{\langle x, u \rangle, x \in \mathcal{K}\}$  for any  $u \in \mathbb{S}^{d-1}$  where  $\mathcal{K}$  is a convex compact of  $\mathbb{R}^d$ . Following [Schneider \(1993\)](#), for two (convex) regions  $D_{\mu}^{\alpha(\beta)}$  and  $D_{\nu}^{\alpha(\beta)}$ , the Hausdorff distance between them can be calculated as:

$$d_{\mathcal{H}}(D_{\mu}^{\alpha(\beta)}, D_{\nu}^{\alpha(\beta)}) = \sup_{u \in \mathbb{S}^{d-1}} |h_{D_{\mu}^{\alpha(\beta)}}(u) - h_{D_{\nu}^{\alpha(\beta)}}(u)|.$$

As we shall see in [Section 5.1](#), mutual approximation of  $h_{D_{\mu}^{\alpha(\beta)}}(u)$  by points from the sample and of sup by taking maximum over a finite set of directions allows for stable estimation quality. Recently, motivated by their numerous applications, many algorithms have been developed for the (exact and approximate) computation of data depths; see, e.g., [Section 5 of Mosler & Mozharovskiy \(2021\)](#) for a recent overview. Depths satisfying the projection property (which also include halfspace and projection depth, see [Dyckerhoff \(2004\)](#)) can be approximated by taking minimum over univariate depths; see e.g. [Rousseeuw & Struyf \(1998\)](#); [Chen et al. \(2013\)](#); [Liu & Zuo \(2014\)](#), [Nagy et al. \(2020\)](#) for theoretical guarantees, and [Dyckerhoff et al. \(2021\)](#) for an experimental validation.

**Empirical data.** Let  $\mathbf{X}, \mathbf{Y}$  be two samples  $\mathbf{X} = \{X_1, \dots, X_n\}$  and  $\mathbf{Y} = \{Y_1, \dots, Y_m\}$  from  $\mu, \nu$  such that  $\hat{\mu}_n = (1/n) \sum_{i=1}^n \delta_{X_i}$  and  $\hat{\nu}_m = (1/m) \sum_{i=1}^m \delta_{Y_i}$ . When calculating approximated depth of sample points  $D^{\mathbf{X}} \triangleq \{D(X_i, \hat{\mu}_n)\}_{i=1}^n$  (respectively  $D^{\mathbf{Y}}$ ), a matrix  $\mathbf{M}^{\mathbf{X}} \in \mathbb{R}^{n \times K}$  (respectively  $\mathbf{M}^{\mathbf{Y}} \in \mathbb{R}^{m \times K}$ ) of projections of sample points on (a common) set of  $K \in \mathbb{N}^*$  directions (with its element  $\mathbf{M}_{i,k}^{\mathbf{X}} = \langle u_k, X_i \rangle$  for some  $u_k \sim \mathcal{U}(\mathbb{S}^{d-1})$ , where  $\mathcal{U}(\cdot)$  is the uniform probability distribution) can be obtained as a side product. More precisely,  $D^{\mathbf{X}}, D^{\mathbf{Y}}, \mathbf{M}^{\mathbf{X}}, \mathbf{M}^{\mathbf{Y}}$  are used in [Algorithm 1](#), which implements the MC-approximation of the integral in [\(3\)](#). See [Figure 1](#) for an illustration of the principle of this algorithm in practice.

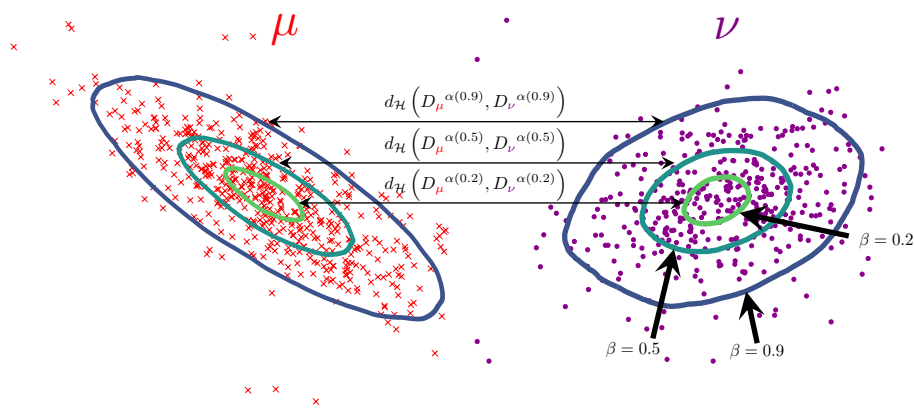

Figure 1: Illustration of the principle of the depth trimmed-regions based pseudo-metric with  $n_{\alpha} = 3$  and  $\beta = \{0.2, 0.5, 0.9\}$ .

Particular cases of approximation algorithms for the halfspace depth and the projection depth are recalled in [Section C](#) in the Appendix. Time complexity of [Algorithm 1](#) is  $O(K(\Omega.(n \vee m, d) \vee n_{\alpha}(n \vee m)))$ , where  $\Omega(\cdot, \cdot)$  stands for the complete complexity of computing univariate depths—in projections on  $u$ —for all points of the sample. As a byproduct, projections on  $u$  can be saved to be reused after for the approximation of  $h_{D_{\mu}^{\alpha(\beta)}}(u)$ . For the halfspace depth  $\Omega_{hsp}(n, d) = O(n(d \vee \log n))$  composed of projection of the data onto  $u$ , ordering them, and passing to record the depths, see [Mozharovskiy et al. \(2015\)](#). For the projection depth,  $\Omega_{prj}(n, d) = O(nd)$ , where after projecting the data onto  $u$ , univariate median and MAD can be computed with complexity  $O(n)$ , see [Liu & Zuo \(2014\)](#). In comparison with popular distances, fixing  $n = m$ , the Wasserstein distance is of order  $O(n^2(d \vee n))$  with approximations in  $O(n^2d)$  for Sinkhorn ([Cuturi et al., 2013](#)) and in  $O(Kn(d \vee \log(n)))$  for the Sliced-Wasserstein distance ([Rabin et al., 2012](#)); the MMD ([Gretton](#)

et al., 2007) is of order  $O(n^2d)$ . For example, the computational complexity of  $DR_{p,\varepsilon}$  with the projection depth is only of  $O(Kn(d \vee n_\alpha))$  and thus competes with the fastest (max) sliced-Wasserstein distance.

---

**Algorithm 1** Approximation of  $DR_{p,\varepsilon}$ 


---

*Initialization:*  $\mathbf{X}, \mathbf{Y}, n_\alpha, K$

- 1:  $H = 0$ ; compute  $D^{\mathbf{X}}, D^{\mathbf{Y}}, \mathbf{M}^{\mathbf{X}}, \mathbf{M}^{\mathbf{Y}}$
  - 2: **for**  $\ell = 1, \dots, n_\alpha$  **do**
  - 3:   Draw  $\beta_\ell \sim \mathcal{U}([0, 1 - \varepsilon])$
  - 4:   Compute  $\hat{\alpha}_\ell(\cdot) := \hat{\alpha}(\beta_\ell, \cdot)$
  - 5:   Determine points inside  $\alpha_\ell(\cdot)$ -regions:  
 $\mathcal{I}_\ell^{\mathbf{X}} = \{i : D_i^{\mathbf{X}} > \hat{\alpha}_\ell(\mathbf{X})\}; \mathcal{I}_\ell^{\mathbf{Y}} = \{j : D_j^{\mathbf{Y}} > \hat{\alpha}_\ell(\mathbf{Y})\}$
  - 6:   **for**  $k = 1, \dots, K$  **do**
  - 7:     Compute approximation of support functions:  $h_k^{\mathbf{X}} = \max_{\mathcal{I}_\ell^{\mathbf{X}}, k} \mathbf{M}_{\mathcal{I}_\ell^{\mathbf{X}}, k}^{\mathbf{X}}; h_k^{\mathbf{Y}} = \max_{\mathcal{I}_\ell^{\mathbf{Y}}, k} \mathbf{M}_{\mathcal{I}_\ell^{\mathbf{Y}}, k}^{\mathbf{Y}}$
  - 8:   **end for**
  - 9:   Increase cumulative Hausdorff distance:  
 $H += \max_{k \leq K} |h_k^{\mathbf{X}} - h_k^{\mathbf{Y}}|^p$
  - 10: **end for**
- Output:**  $\widehat{DR}_{p,\varepsilon} = (H/n_\alpha)^{1/p}$
- 

## 5 Numerical Experiments

In this section, we first investigate different properties of the proposed pseudo-metric such as the convergence rates of the pseudo-metric estimator w.r.t. the sample size, the quality of the approximation introduced in Section 4 and its dependency on the number of projections. Further, we present two studies on the robustness of the proposed pseudo-metric  $DR_{p,\varepsilon}$  to outliers. Finally, we show the performance of this pseudo-metric on two machine learning tasks, clustering and automatic evaluation of neural language generation. Where applicable, we include state-of-the-art methods for comparison.

### 5.1 Statistical Convergence, Approximation and Robustness

This part describes the behavior of the proposed pseudo-metric through different perspectives. On synthetic datasets, we investigate the statistical convergence rates of the empirical version of  $DR_{p,\varepsilon}$  to the population one. We assess the Monte Carlo approximation proposed in Section 4 and compare it to the Sliced Wasserstein distance. Finally, we highlight how  $DR_{p,\varepsilon}$  behaves under the presence of outliers using two different settings. Due to space limitations, experiments on the influence of the parameters  $n_\alpha$  and  $\varepsilon$  are deferred to the Appendix section.

**Empirical analysis of statistical rates.** Deriving theoretical finite-sample analysis may appear to be challenging for the proposed pseudo-metric. Thus, we numerically investigate the statistical convergence speed of  $DR_{2,\varepsilon}$ . To that end, we simulate two samples  $\mathbf{X}$  and  $\mathbf{Y}$  from two standard Gaussian distributions in dimension two with varying sample sizes from  $n = 10$  to  $n = 10000$ , see Section D.3 for additional experiments with  $d \in \{5, 10\}$ . We compute the  $DR_{2,\varepsilon}$  between  $\mathbf{X}$  and  $\mathbf{Y}$  with  $n_\alpha \in \{5, 20, 100\}$  using the halfspace and the projection depths. Our proposed metric is computed with a high number of directions  $K = 25000$  to isolate the statistical error. We report the estimation error averaged over ten runs in Figure 2 (log-log scale), that is, the value of the pseudo-metric itself, the true value of  $DR_{2,\varepsilon}$  being equal to zero. When the Monte Carlo approximation error influenced by the parameter  $n_\alpha$  is negligible ( $n_\alpha = 100$ ), Figure 2 suggests that the statistical rates should be in  $O(n^{1/4})$ . Furthermore, Figure 7 indicates a rates of order  $O(n^{0.8/4})$  and Figure 8 of order  $O(n^{0.6/4})$ . These observations suggest a slow rate that depends on the dimension  $d$  of the data. However, the approximation error being negligible due to the  $K = 25000$  sampled directions, the statistical rates seem to depend only linearly on the dimension. Looking at the error values for  $n = 10000$  for  $d = 2, 5, 10$ , it increases by a factor of two, such as the dimension. This is the same behavior highlighted by the Sliced-Wasserstein distance, where the statistical rates do not suffer from the curse of the dimensionality



while its Monte Carlo approximation behaves exponentially regarding  $d$ , as highlighted in the following experiment.

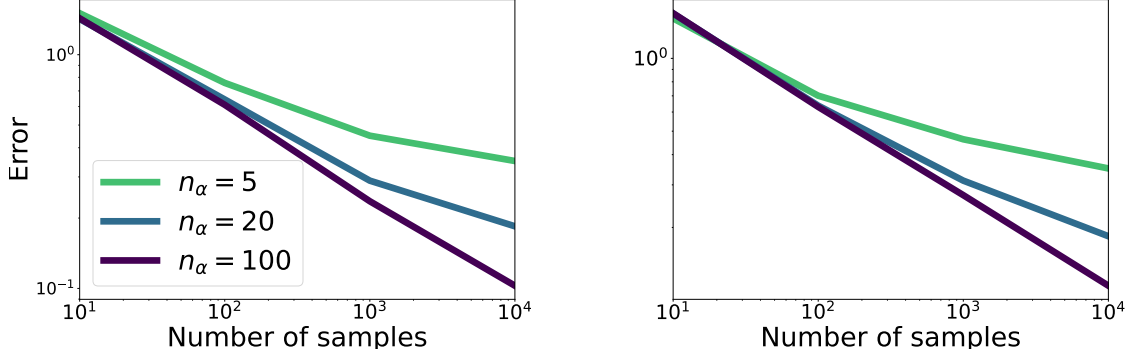

Figure 2: Empirical analysis of statistical convergence rates. Resulting error of the proposed pseudo-metric when increasing the sample size using the projection depth (left) and the halfspace depth (right) for various  $n_\alpha$  parameters.

**Approximation error in terms of the number of projections.** Proposition 3.6 allows to derive a closed form expression for  $DR_{2,\varepsilon}(\mu, \nu)$  when  $\mu, \nu$  are Gaussian distributions with the same variance-covariance matrix. In order to investigate the quality of the approximation on light-tailed and heavy-tailed distributions, we focus on computing  $DR_{p,\varepsilon}$  with  $p = 2$ ,  $\varepsilon = 0.3$ ,  $n_\alpha = 20$  and using the halfspace depth for varying number of random projections  $K$  between a sample of 1000 points stemming from  $\mu \sim \mathcal{N}(\mathbf{0}_d, I_d)$  for  $d = 5$  and two different samples. These two samples are constructed from 1000 observations stemming from *Gaussian* and symmetrical *Cauchy* distributions, both with a center equal to  $\mathbf{7}_d$ . Comparison with the approximation of max Sliced-Wasserstein (max-SW; see e.g. Kolouri et al., 2019), which shares the same closed-form as  $DR_{2,\varepsilon}$ , is also provided. Denoting by  $\widehat{\text{max-SW}}$  the Monte-Carlo approximation of the max-SW, the relative approximation errors, i.e.,  $(\widehat{DR}_{p,\varepsilon} - \|\mathbf{7}_d\|_2) / \|\mathbf{7}_d\|_2$  and  $(\widehat{\text{max-SW}} - \|\mathbf{7}_d\|_2) / \|\mathbf{7}_d\|_2$ , are computed investigating both the quality of the approximation and the robustness of these discrepancy measures. Results that report the averaged approximation error and the 25-75% empirical quantile intervals are depicted in Figure 3. They show that  $DR_{p,\varepsilon}$  possesses the same behavior as max-SW when considering *Gaussians* while it behaves advantageously for *Cauchy* distribution. Computation times are depicted in Figure 4, highlighting a constant-multiple improvement compared to the max-SW, which is already computationally fast.

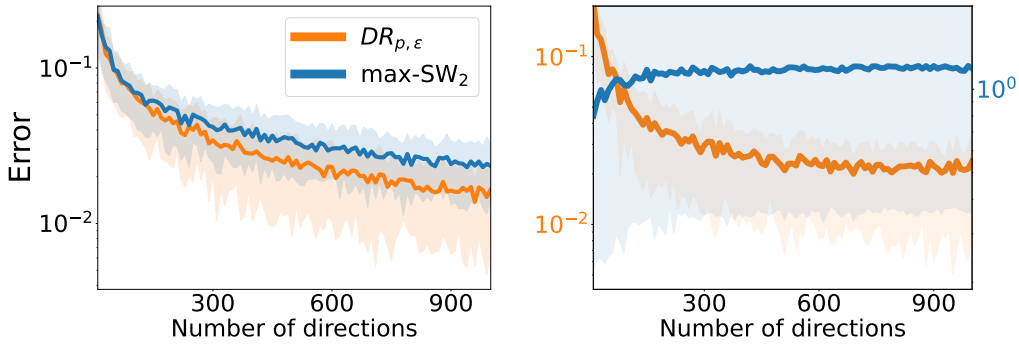

Figure 3: Relative approximation error (averaged over 100 runs) of  $DR_{p,\varepsilon}$  and the max Sliced-Wasserstein for *Gaussian* (left) and *Cauchy* (right) sample with dimension  $d = 5$  for differing numbers of approximating directions.

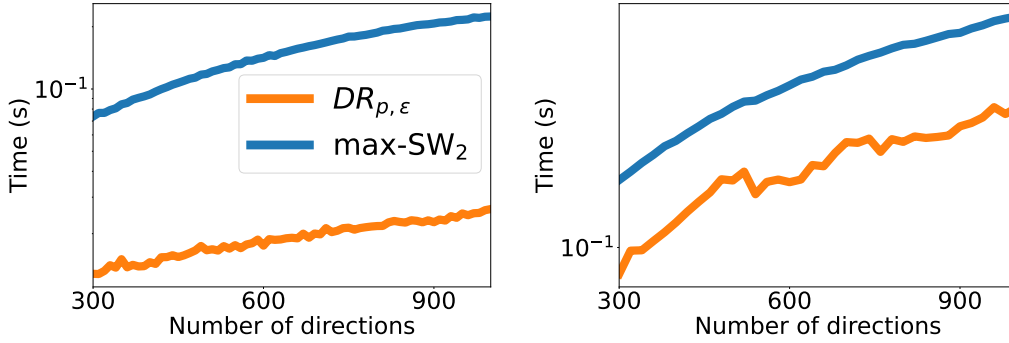

Figure 4: Computation time (averaged over 100 runs) of  $DR_{p,\varepsilon}$  and the max Sliced-Wasserstein for *Gaussian* with  $n = 100$ ,  $d = 5$  (left) and  $n = 1000$ ,  $d = 50$  (right) for differing numbers of approximating directions.

**Robustness to outliers.** We analyze the robustness of  $DR_{p,\varepsilon}$  by measuring its ability to overcome outliers (its robustness regarding the influence of the parameter  $\varepsilon$  are given in the Section D.4 in the Appendix). In this benchmark, we naturally include existing robust extensions of the Wasserstein distance: Subspace Robust Wasserstein (SRW; Paty & Cuturi, 2019) searching for a maximal distance on lower-dimensional subspaces, ROBOT (Mukherjee et al., 2020) and RUOT (Balaji et al., 2020) being robust modifications of the unbalanced optimal transport (Chizat et al., 2018). Medians-of-Means Wasserstein (MoMW; Staerman et al., 2021a) that replaces the empirical means in the Kantorovich duality formulae by the robust mean estimator MoM (see e.g. Lecué & Lerasle, 2020; Laforgue et al., 2021), is not employed due to high computational burden. Further, for completeness, we add the standard Wasserstein distance (W) and its approximation, the Sliced-Wasserstein (Sliced-W; Rabin et al., 2012) distance, with the same number of projections ( $K = 1000$ ) as  $DR_{p,\varepsilon}$ . Since the scales of the compared methods differ, *relative error* is used as a performance metric, i.e., the ratio of the absolute difference of the computed distance with and without anomalies divided by the latter. Two settings for a pair of distributions are addressed: (a) *Fragmented hypercube* precedently studied in Paty & Cuturi (2019), where the source distribution is uniform in the hypercube  $[-1, 1]^2$  and the target distribution is transformed from the source via the map  $T : x \mapsto x + 2\text{sign}(x)$  where  $\text{sign}(\cdot)$  is taken element-wisely. Outliers are drawn uniformly from  $[-4, 4]^2$ . (b) Two multivariate standard *Gaussian* distributions, one shifted by  $\mathbf{10}_2$ , with outliers drawn uniformly from  $[-10, 20]^2$ . Our analysis is conducted over 500 sampled points from the distributions described above.

To investigate the robustness of  $DR_{p,\varepsilon}$ , we consider the following values of  $\varepsilon$ : 0.1, 0.2, 0.3 computed with the projection depth. Thus, data depths are computed on source and target distributions such that 10%, 20%, 30% of data with lower depth values w.r.t. each distribution are not used in computation of  $DR_{p,0.1}$ ,  $DR_{p,0.2}$ ,  $DR_{p,0.3}$ , respectively. Figure 5, which plots the relative error depending on the portion of outliers varying up to 20%, illustrates advantageous behavior of  $DR_{p,\varepsilon}$  (for  $\varepsilon = 0.1, 0.2, 0.3$ ) for reasonable (starting with  $\approx 2.5\%$ ) contamination. It also confirms the pessimism of the breakdown point provided in Proposition 3.7 since  $DR_{p,0.1}$  (represented by the blue curve) shows robustness to at least 20 % of outliers.

## 5.2 Machine Learning Applications

This part presents two machine learning applications, clustering applied to images and automatic evaluation of natural language generation. On a real image dataset extracted from Fashion-MNIST where images are seen as bags of pixels, we evaluate the robustness of spectral clustering based on  $DR_{p,\varepsilon}$ . Further, we analyze the relevance of using  $DR_{p,\varepsilon}$  as an evaluation metric in natural language generation to compare the empirical distributions of words of a pair of texts.

**(Robust) Clustering on bags of pixels.** We demonstrate the relevance of the proposed pseudo-metric through an application to (robust) clustering. To that end, we perform spectral clustering (Shi & Malik, 2000) on two datasets derived from Fashion-MNIST (FM). Each grayscale image is seen as a bag of pixels (Jebara, 2003), i.e. as an empirical probability distribution over a 3-dimensional space (the two first dimensions

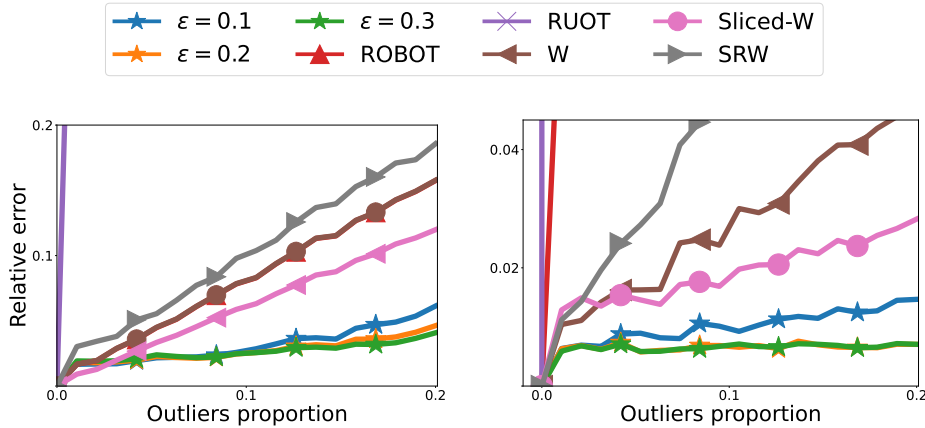

Figure 5: Relative error (averaged over 100 runs) of different distances for increasing outliers proportion on *fragmented hypercube* (left) and *Gaussian* (right) data.

indicate the pixel position and the third one, its intensity). The first dataset (FM) is constructed by taking the 100 first images in each class of the Fashion-MNIST dataset. The second dataset (Cont. FM), considered contaminated, is designed by introducing white patches on the left corner of 50 images drawn uniformly in the first dataset, which yields 5% of contamination. We benchmark  $DR_{p,\varepsilon}$  (using the projection depth) setting  $p = 2$  and  $\varepsilon = 0.1$  with the Wasserstein (W), the Sliced-Wasserstein (Sliced-W) and the Maximum Mean Discrepancy (MMD; [Gretton et al., 2007](#)) distances.  $DR_{p,\varepsilon}$  and the Sliced-Wasserstein are approximated by Monte-Carlo using 100 directions while the MMD distance is computed using a Gaussian kernel with a bandwidth equal to 1. As a baseline method, spectral clustering is also applied to images considered as vectors using Euclidean distance. Standard parameters of the `scikit-learn` spectral clustering implementation are employed with a number of clusters fixed to 10. Performances of the benchmarked metrics are assessed by measuring the normalized mutual information (NMI; [Shannon, 1948](#)) and the adjusted rank index (ARI; [Hubert & Arabie, 1985](#)), which are standard clustering evaluation measures when the ground truth class labels are available. Results presented in Table 1 show that for both cases, i.e. with or without contamination, spectral clustering based on  $DR_{p,\varepsilon}$  outperforms spectral clustering based on the other metrics.

|                      | FM          |             | Cont. FM    |             |
|----------------------|-------------|-------------|-------------|-------------|
|                      | NMI         | ARI         | NMI         | ARI         |
| $DR_{p,\varepsilon}$ | <b>0.58</b> | <b>0.43</b> | <b>0.55</b> | <b>0.42</b> |
| W                    | 0.50        | 0.35        | 0.48        | 0.30        |
| Sliced-W             | 0.55        | 0.39        | 0.47        | 0.33        |
| MMD                  | 0.54        | 0.37        | 0.50        | 0.36        |
| Euclidean            | 0.50        | 0.32        | 0.48        | 0.30        |

Table 1: Spectral clustering performances.

**Automatic evaluation of natural language generation (NLG).** Collecting human annotations to evaluate NLG systems is both expensive and time-consuming. Thus, automatically assessing the similarity between two texts is highly interesting for the NLP community ([Specia et al., 2010](#)). This task aims to build an evaluation metric that achieves a high correlation with the score given by a human annotator. String-based metrics (i.e. that compare the string representations of texts) such as BLEU ([Papineni et al., 2002](#)), METEOR (MET.; [Banerjee & Lavie, 2005](#)), ROUGE ([Lin, 2004](#)), TER ([Snover et al., 2006](#)), have been outperformed in many tasks by embedding-based metrics, i.e., that rely on continuous representations ([Devlin et al., 2019](#)). Embedding-based metrics, e.g BertScore (BertS; [Zhang et al., 2019](#)) and MoverScore

|                      | Correctness |             |             | Data Coverage |             |             | Relevance   |             |             |
|----------------------|-------------|-------------|-------------|---------------|-------------|-------------|-------------|-------------|-------------|
|                      | $r$         | $\tau$      | $\rho$      | $r$           | $\tau$      | $\rho$      | $r$         | $\tau$      | $\rho$      |
| $DR_{p,\varepsilon}$ | <b>89.4</b> | <b>80.0</b> | <b>92.6</b> | <b>84.2</b>   | <u>58.3</u> | <u>72.3</u> | <b>86.2</b> | <u>62.7</u> | <u>72.9</u> |
| W                    | 86.2        | 73.0        | 86.7        | 80.4          | 45.3        | 62.3        | 83.8        | 51.3        | 67.6        |
| Sliced-W             | 86.1        | 73.0        | 85.8        | 80.9          | 45.5        | 60.0        | 82.0        | 51.3        | 68.2        |
| MMD                  | 25.4        | 71.7        | 8.3         | 19.1          | 45.3        | 10.0        | 26.1        | 51.3        | 15.0        |
| BertS                | <u>85.5</u> | <u>73.3</u> | 83.4        | 74.7          | <u>53.3</u> | <u>68.2</u> | <u>83.3</u> | <u>65.0</u> | <b>79.4</b> |
| MoverS               | 84.1        | <u>73.3</u> | <u>84.1</u> | <u>78.7</u>   | <u>53.3</u> | 66.2        | 82.1        | <u>65.0</u> | 77.4        |
| BLEU                 | 77.6        | 60.0        | 66.3        | 55.7          | 36.6        | 50.2        | 63.0        | 51.6        | 65.2        |
| ROUGE                | 80.6        | 65.0        | 65.0        | 76.5          | <b>60.3</b> | <b>76.3</b> | 64.3        | 56.7        | 69.2        |
| MET.                 | <u>86.5</u> | <u>70.0</u> | 66.3        | <u>77.3</u>   | 46.6        | 50.2        | <u>82.1</u> | 58.6        | 65.2        |
| TER                  | 79.6        | 58.0        | <u>78.3</u> | 69.7          | 38.0        | 58.2        | 75.0        | <b>77.6</b> | <u>70.2</u> |

Table 2: Absolute correlation at the system level with three human judgment criteria. The best overall results are indicated in bold, best results in their group are underlined.

(MoverS; Zhao et al., 2019) that are now the state-of-the-art domain, compare input and reference texts both represented as probability distributions and are both constructed similarly. The first step relies on a deep contextualized encoder (BERT in our case, see Devlin et al., 2019) that maps texts into elements of a finite-dimensional space. Each text corresponds to a collection of words, where each word is represented by an element in  $\mathbb{R}^d$ , where  $d$  is fixed by the encoder. The second step involves using a function that measures the similarity between the embedded texts.

We follow previous BERT-based metrics and evaluate performances of  $DR_{p,\varepsilon}$  (with  $p = 2$ ,  $\varepsilon = 0.01$  and using the AI-IRW depth (Staerman et al., 2021b)) on two different NLG tasks namely: data2text generation (using the WebNLG 2020 dataset Ferreira et al., 2020) and summarization. For the sake of place, summarization results and additional experimental details are reported in Section E in the Appendix. For WebNLG, we follow standard methods to assess the performance of NLG metrics (see e.g. Zhao et al., 2019). We compute the correlation with the following annotation scores: *correctness*, *data coverage*, and *relevance*. We report in Table 2 correlation results on the WebNLG task using Pearson ( $r$ ), Spearman ( $\rho$ ) and Kendall ( $\tau$ ) correlation coefficients. When performing a fair comparison between metrics, i.e. when  $DR_{p,\varepsilon}$ , W, Sliced-W, MMD are directly used on the output of BERT, we observe that  $DR_{p,\varepsilon}$  achieves the best results on all configurations. It is worth noting that  $DR_{p,\varepsilon}$  also compares favorably against existing state-of-the-art NLG methods in many different scenarios and shows promising results.

## 6 Discussion

Leveraging the notion of statistical data depth function, a novel pseudo-metric between multivariate probability distributions—that meets the aforementioned requirements—was introduced. The developed framework exhibits inherent versatility due to numerous data depth variants. The linear approximation algorithm and the robustness property make  $DR_{p,\varepsilon}$  a promising tool for a large spectrum of applications beyond clustering and NLG, e.g. in generative adversarial networks (GANs) or information retrieval. Moreover, recent works extending the notion of data depth to further types of data such as functional and time-series data (Nieto-Reyes & Battey, 2016; Gijbels & Nagy, 2017), directional (or spherical) data (Ley et al., 2014), random matrices (Paindaveine & Van Bever, 2018), curves (or paths) data (Lafaye et al., 2020), and random sets (Cascos et al., 2021) shall allow for the use of the proposed pseudo-metric for a wide range of applications.

## References

- Martin Arjovsky, Soumith Chintala, and Léon Bottou. Wasserstein gan. *arXiv preprint arXiv:1701.07875*, 2017.
- Sören Auer, Christian Bizer, Georgi Kobilarov, Jens Lehmann, Richard Cyganiak, and Zachary Ives. Dbpedia: A nucleus for a web of open data. In *The semantic web*, pp. 722–735. Springer, 2007.
- Yogesh Balaji, Rama Chellappa, and Soheil Feizi. Robust optimal transport with applications in generative modeling and domain adaptation. *Advances in Neural Information Processing Systems*, 33:12934–12944, 2020.
- Satanjeev Banerjee and Alon Lavie. Meteor: An automatic metric for mt evaluation with improved correlation with human judgments. In *Proceedings of the acl workshop on intrinsic and extrinsic evaluation measures for machine translation and/or summarization*, pp. 65–72, 2005.
- Vic Barnett. The ordering of multivariate data. *Journal of the Royal Statistical Society: Series A (General)*, 139(3):318–344, 1976.
- Manik Bhandari, Pranav Gour, Atabak Ashfaq, Pengfei Liu, and Graham Neubig. Re-evaluating evaluation in text summarization. *arXiv preprint arXiv:2010.07100*, 2020.
- Patrick Billingsley. *Convergence of probability measures (2nd ed.)*. John Wiley & Sons, 1999.
- Victor-Emmanuel Brunel. Concentration of the empirical level sets of tukey’s halfspace depth. *Probability Theory and Related Fields*, 173(3):1165–1196, 2019.
- Ignacio Cascos, Qiyu Li, and Ilya Molchanov. Depth and outliers for samples of sets and random sets distributions. *Australian & New Zealand Journal of Statistics*, 63(1):55–82, 2021.
- Sung-Hyuk Cha and Sargur N. Srihari. On measuring the distance between histograms. *Pattern Recognit.*, 35(6):1355–1370, 2002.
- Emile Chapuis, Pierre Colombo, Matteo Manica, Matthieu Labeau, and Chloe Clavel. Hierarchical pre-training for sequence labelling in spoken dialog. *arXiv preprint arXiv:2009.11152*, 2020.
- Emile Chapuis, Pierre Colombo, Matthieu Labeau, and Chloe Clave. Code-switched inspired losses for generic spoken dialog representations. *arXiv preprint arXiv:2108.12465*, 2021.
- Eirini Chatzikoumi. How to evaluate machine translation: A review of automated and human metrics. *Natural Language Engineering*, 26(2):137–161, 2020.
- Dan Chen, Pat Morin, and Uli Wagner. Absolute approximation of tukey depth: Theory and experiments. *Computational Geometry*, 46(5):566 – 573, 2013.
- Yen-Chun Chen and Mohit Bansal. Fast abstractive summarization with reinforce-selected sentence rewriting. *arXiv preprint arXiv:1805.11080*, 2018.
- Lénaïc Chizat, Gabriel Peyré, Bernhard Schmitzer, and François-Xavier Vialard. Unbalanced optimal transport: dynamic and kantorovich formulations. *Journal of Functional Analysis*, 274(11):3090 – 3123, 2018.
- Pierre Colombo, Wojciech Witon, Ashutosh Modi, James Kennedy, and Mubbasir Kapadia. Affect-driven dialog generation. *arXiv preprint arXiv:1904.02793*, 2019.
- Pierre Colombo, Emile Chapuis, Matteo Manica, Emmanuel Vignon, Giovanna Varni, and Chloe Clavel. Guiding attention in sequence-to-sequence models for dialogue act prediction. In *Proceedings of the AAAI Conference on Artificial Intelligence*, volume 34, pp. 7594–7601, 2020.
- Pierre Colombo, Guillaume Staerman, Chloé Clavel, and Pablo Piantanida. Automatic text evaluation through the lens of Wasserstein barycenters. In *Proceedings of the 2021 Conference on Empirical Methods in Natural Language Processing*, pp. 10450–10466. Association for Computational Linguistics, 2021a.

- Pierre Colombo, Chouchang Yang, Giovanna Varni, and Chloé Clavel. Beam search with bidirectional strategies for neural response generation. *arXiv preprint arXiv:2110.03389*, 2021b.
- N. Courty, R. Flamary, D. Tuia, and A. Rakotomamonjy. Optimal transport for domain adaptation. *IEEE Transactions on Pattern Analysis and Machine Intelligence*, 39(9):1853–1865, 2017.
- Nicolas Courty, Rémi Flamary, and Devis Tuia. Domain adaptation with regularized optimal transport. In Toon Calders, Floriana Esposito, Eyke Hüllermeier, and Rosa Meo (eds.), *Machine Learning and Knowledge Discovery in Databases*, pp. 274–289, 2014.
- Imre Csiszár. Eine informationstheoretische ungleichung und ihre anwendung auf den beweis der ergodizität von markhoffschen kette. *Magyer Tud. Akad. Mat. Kutato Int. Koezl*, 8:85–108, 1963.
- Marco Cuturi, Olivier Teboul, and Jean-Philippe Vert. Sinkhorn distances: Lightspeed computation of optimal transportation. In *Advances in Neural Information Processing Systems*, 2013.
- Hoa Trang Dang and Karolina Owczarzak. Overview of the tac 2008 update summarization task. In *Proceedings of the Text Analysis Conference (TAC)*, 2008.
- Jacob Devlin, Ming-Wei Chang, Kenton Lee, and Kristina Toutanova. Bert: Pre-training of deep bidirectional transformers for language understanding. *arXiv preprint arXiv:1810.04805*, 2018.
- Jacob Devlin, Ming-Wei Chang, Kenton Lee, and Kristina Toutanova. BERT: Pre-Training of Deep Bidirectional Transformers for Language Understanding. In *Proceedings of the 2019 Conference of the North American Chapter of the Association for Computational Linguistics: Human Language Technologies, Volume 1 (Long and Short Papers)*, pp. 4171–4186, June 2019.
- Li Dong, Nan Yang, Wenhui Wang, Furu Wei, Xiaodong Liu, Yu Wang, Jianfeng Gao, Ming Zhou, and Hsiao-Wuen Hon. Unified language model pre-training for natural language understanding and generation. *arXiv preprint arXiv:1905.03197*, 2019.
- David L. Donoho. Breakdown properties of location estimators. *P.h.D., qualifying paper, Dept. Statistics, Harvard University*, 1982.
- David L. Donoho and Miriam Gasko. Breakdown properties of location estimates based on half space depth and projected outlyingness. *The Annals of Statistics*, 20:1803–1827, 1992.
- David L. Donoho and Peter J. Hubert. The notion of breakdown point. *A Festschrift for Erich Lehman*, pp. 157–184, 1983.
- Rainer Dyckerhoff. Data depth satisfying the projection property. *Allgemeines Statistisches Archiv*, 88(2): 163–190, 2004.
- Rainer Dyckerhoff, Pavlo Mozharovskyi, and Stanislav Nagy. Approximate computation of projection depths. *Computational Statistics and Data Analysis*, 157:107166, 2021.
- John H.J. Einhmahl and David M. Mason. Generalized quantile process. *The annals of statistics*, 20(2): 1062–1078, 1992.
- Thiago Ferreira, Claire Gardent, Nikolai Ilinykh, Chris van der Lee, Simon Mille, Diego Moussallem, and Anastasia Shimorina. The 2020 bilingual, bi-directional webnlg+ shared task overview and evaluation results (webnlg+ 2020). In *Proceedings of the 3rd International Workshop on Natural Language Generation from the Semantic Web (WebNLG+)*, 2020.
- Thiago Castro Ferreira, Diego Moussallem, Emiel Krahmer, and Sander Wubben. Enriching the webnlg corpus. In *Proceedings of the 11th International Conference on Natural Language Generation*, pp. 171–176, 2018.
- Alexandre Garcia, Pierre Colombo, Slim ESSID, Florence d’Alché Buc, and Chloé Clavel. From the token to the review: A hierarchical multimodal approach to opinion mining. *arXiv preprint arXiv:1908.11216*, 2019.



- Claire Gardent, Anastasia Shimorina, Shashi Narayan, and Laura Perez-Beltrachini. Creating training corpora for nlg micro-planning. In *55th annual meeting of the Association for Computational Linguistics (ACL)*, 2017.
- Sebastian Gehrmann, Yuntian Deng, and Alexander Rush. Bottom-up abstractive summarization. In *Proceedings of the 2018 Conference on Empirical Methods in Natural Language Processing*, pp. 4098–4109, 2018.
- Irène Gijbels and Stanislav Nagy. On a general definition of depth for functional data. *Statistical Science*, 32(4):630–639, 2017.
- Arthur Gretton, Karsten Borgwardt, Malte Rasch, Bernhard Schölkopf, and Alex Smola. A kernel method for the two-sample-problem. *Advances in Neural Information Processing Systems*, 2007.
- Marc Hallin, Davy Paindaveine, and Miroslav Šiman. Multivariate quantiles and multiple-output regression quantiles: From l1 optimization to halfspace depth. *Ann. Statist.*, 38(2):635–669, 04 2010.
- Lawrence Hubert and Phipps Arabie. Comparing partitions. *Journal of Classification*, 2(1):193–218, 1985.
- Hicham Janati, Marco Cuturi, and Alexandre Gramfort. Wasserstein regularization for sparse multi-task regression. In *The 22nd International Conference on Artificial Intelligence and Statistics*, pp. 1407–1416. PMLR, 2019.
- Tony Jebara. Images as bags of pixels. In *Proceedings of the Ninth IEEE International Conference on Computer Vision*, pp. 265–272, 2003.
- Rebecka Jörnsten. Clustering and classification based on the l1 data depth. *Journal of Multivariate Analysis*, 90(1):67 – 89, 2004.
- Chris Kedzie, Kathleen McKeown, and Hal Daume III. Content selection in deep learning models of summarization. *arXiv preprint arXiv:1810.12343*, 2018.
- Maurice G Kendall. A new measure of rank correlation. *Biometrika*, 30(1/2):81–93, 1938.
- Philipp Koehn. *Statistical machine translation*. Cambridge University Press, 2009.
- Soheil Kolouri, Kimia Nadjahi, Simsekli Umut, Roland Badeau, and Gustavo Rohde K. Generalized sliced wasserstein distance. In *Advances Neural Information Processing Systems*, 2019.
- Vladimir I. Koltchinskii and Robert M. Dudley. On spatial quantiles. *Unpublished manuscript*, 1996.
- Gleb Koshevoy and Karl Mosler. Zonoid trimming for multivariate distributions. *The Annals of Statistics*, 25(5):1998–2017, 10 1997.
- Solomon Kullback. *Information Theory and Statistics*. John Wiley, 1959.
- Matt Kusner, Yu Sun, Nicholas Kolkin, and Kilian Weinberger. From word embeddings to document distances. In *International conference on machine learning*, pp. 957–966. PMLR, 2015.
- Pierre Lafaye, Pavlo Mozharovskyi, and Myriam Vimond. Depth for curve data and applications. *Journal of the American Statistical Association*, pp. 1–17, 2020. in press.
- Pierre Laforgue, Guillaume Staerman, and Stephan Cléménçon. Generalization bounds in the presence of outliers: a median-of-means study. In *Proceedings of the 38th International Conference on Machine Learning*, volume 139, pp. 5937–5947, 2021.
- Tatjana Lange, Karl Mosler, and Pavlo Mozharovskyi. Fast nonparametric classification based on data depth. *Statistical Papers*, 55(1):49–69, 2014.
- Guillaume Lecué and Matthieu Lerasle. Robust machine learning by median-of-means: Theory and practice. *The Annals of Statistics*, 48(2):906–931, 04 2020.

- Gregor Leusch, Nicola Ueffing, Hermann Ney, et al. A novel string-to-string distance measure with applications to machine translation evaluation. In *Proceedings of Mt Summit IX*, pp. 240–247, 2003.
- Gregor Leusch, Nicola Ueffing, and Hermann Ney. CDER: Efficient MT evaluation using block movements. In *11th Conference of the EACL*, 2006.
- Mike Lewis, Yinhan Liu, Naman Goyal, Marjan Ghazvininejad, Abdelrahman Mohamed, Omer Levy, Ves Stoyanov, and Luke Zettlemoyer. Bart: Denoising sequence-to-sequence pre-training for natural language generation, translation, and comprehension. *arXiv preprint arXiv:1910.13461*, 2019.
- Christophe Ley, Camille Sabbah, and Thomas Verdebout. A new concept of quantiles for directional data and the angular Mahalanobis depth. *Electronic Journal of Statistics*, 8(1):795–816, 2014.
- Jun Li, Juan A. Cuesta-Albertos, and Regina Y. Liu. Dd-classifier: Nonparametric classification procedure based on dd-plot. *JASA*, 107(498):737–753, 2012.
- Chin-Yew Lin. ROUGE: A package for automatic evaluation of summaries. In *Text Summarization Branches Out*, pp. 74–81, 2004.
- Regina Y. Liu. On a notion of data depth based on random simplices. *The Annals of Statistics*, 18(1):405–414, 1990.
- Regina Y. Liu. *Data Depth and Multivariate Rank Tests*, pp. 279–294. North-Holland, Amsterdam, 1992.
- Regina Y. Liu and Kesar Singh. A quality index based on data depth and multivariate rank tests. *Journal of the American Statistical Association*, 88(421):252–260, 1993.
- Xiaohui Liu and Yijun Zuo. Computing projection depth and its associated estimators. *Statistics and Computing*, 24(1):51–63, 2014.
- Xiaohui Liu, Karl Mosler, and Pavlo Mozharovskiy. Fast computation of tukey trimmed regions and median in dimension  $p > 2$ . *Journal of Computational and Graphical Statistics*, 28(3):682–697, 2019a.
- Yang Liu and Mirella Lapata. Text summarization with pretrained encoders. *arXiv preprint arXiv:1908.08345*, 2019.
- Yinhan Liu, Myle Ott, Naman Goyal, Jingfei Du, Mandar Joshi, Danqi Chen, Omer Levy, Mike Lewis, Luke Zettlemoyer, and Veselin Stoyanov. Roberta: A robustly optimized bert pretraining approach. *arXiv preprint arXiv:1907.11692*, 2019b.
- David J. C. MacKay. *Information theory, inference and learning algorithms*. Cambridge university press, 2003.
- François Mairesse, Milica Gasic, Filip Jurcicek, Simon Keizer, Blaise Thomson, Kai Yu, and Steve Young. Phrase-based statistical language generation using graphical models and active learning. In *Proceedings of the 48th Annual Meeting of the Association for Computational Linguistics*, pp. 1552–1561, 2010.
- Paul McNamee and Hoa Trang Dang. Overview of the tac 2009 knowledge base population track. In *Proceedings of the Text Analysis Conference (TAC)*, volume 17, pp. 111–113, 2009.
- I Dan Melamed, Ryan Green, and Joseph Turian. Precision and recall of machine translation. In *Companion Volume of the Proceedings of HLT-NAACL 2003-Short Papers*, pp. 61–63, 2003.
- Tomas Mikolov, Kai Chen, Greg Corrado, and Jeffrey Dean. Efficient Estimation of Word Representations in Vector Space. *arXiv preprint arXiv:1301.3781*, 2013.
- Karl Mosler. Depth statistics. *Robustness and complex data structures*, 2013.
- Karl Mosler and Pavlo Mozharovskiy. Choosing among notions of depth for multivariate data. *Statistical Science*, 2021. In press.

- Pavlo Mozharovskyi, Karl Mosler, and Tatjana Lange. Classifying real-world data with the  $DD\alpha$ -procedure. *Advances in Data Analysis and Classification*, 9(3):287–314, 2015.
- Debarghya Mukherjee, Aritra Guha, Justin Solomon, Yuekai Sun, and Mikhail Yurochkin. Outlier-robust optimal transport. *arXiv preprint arXiv:2012.07363*, 2020.
- Stanislav Nagy. Halfspace depth does not characterize probability distributions. *Statistical Papers*, 26(3):1135–1139, 2019.
- Stanislav Nagy and Jiří Dvořák. Illumination depth. *Journal of Computational and Graphical Statistics*, 30(1):78–90, 2021.
- Stanislav Nagy, Rainer Dyckerhoff, and Pavlo Mozharovskyi. Uniform convergence rates for the approximated halfspace and projection depth. *Electronic Journal of Statistics*, 14(2):3939–3975, 2020.
- Shashi Narayan, Shay B Cohen, and Mirella Lapata. Ranking sentences for extractive summarization with reinforcement learning. *arXiv preprint arXiv:1802.08636*, 2018.
- Ani Nenkova and Rebecca J Passonneau. Evaluating content selection in summarization: The pyramid method. In *Proceedings of the human language technology conference of the north american chapter of the association for computational linguistics: Hlt-naacl 2004*, pp. 145–152, 2004.
- Ani Nenkova, Rebecca Passonneau, and Kathleen McKeown. The pyramid method: Incorporating human content selection variation in summarization evaluation. *ACM Transactions on Speech and Language Processing (TSLP)*, 4(2):4-es, 2007.
- Alicia Nieto-Reyes and Heather Battey. A topologically valid definition of depth for functional data. *Statistical Science*, 31(1):61–79, 2016.
- Hannu Oja. Descriptive statistics for multivariate distributions. *Statistics & Probability Letters*, 1(6):327–332, 1983.
- Davy Paindaveine and Germain Van Bever. From depth to local depth: A focus on centrality. *Journal of the American Statistical Association*, 108(503):1105–1119, 2013.
- Davy Paindaveine and Germain Van Bever. Halfspace depths for scatter, concentration and shape matrices. *The Annals of Statistics*, 46(6B):3276–3307, 12 2018.
- Victor M. Panaretos and Yoav Zemel. Statistical aspects of wasserstein distances. *Annual Review of Statistics and Its Application*, 6(1):405–431, 2019.
- Kishore Papineni, Salim Roukos, Todd Ward, and Wei-Jing Zhu. Bleu: a method for automatic evaluation of machine translation. In *Proceedings of the 40th Annual Meeting of the Association for Computational Linguistics*, pp. 311–318, July 2002.
- François-Pierre Paty and Marco Cuturi. Subspace robust Wasserstein distances. In *Proceedings of the 36th International Conference on Machine Learning*, volume 97, pp. 5072–5081, 2019.
- Jeffrey Pennington, Richard Socher, and Christopher Manning. GloVe: Global Vectors for Word Representation. In *Proceedings of the 2014 EMNLP (EMNLP)*, pp. 1532–1543. ACL, 2014.
- Laura Perez-Beltrachini, Rania Sayed, and Claire Gardent. Building rdf content for data-to-text generation. In *The 26th International Conference on Computational Linguistics (COLING 2016)*, 2016.
- Matthew E. Peters, Mark Neumann, Mohit Iyyer, Matt Gardner, Christopher Clark, Kenton Lee, and Luke Zettlemoyer. Deep contextualized word representations. In *Proc. of NAACL*, 2018.
- Gabriel Peyré and Marco Cuturi. Computational optimal transport. *Foundations and Trends® in Machine Learning*, 11(5-6):355–607, 2019.

- Oleksii Pokotylo, Pavlo Mozharovskyi, and Rainer Dyckerhoff. Depth and depth-based classification with R-Package ddalpha. *Journal of Statistical Software, Articles*, 91(5):1–46, 2019.
- Julien Rabin, Gabriel Peyré, Julie Delon, and Marc Bernot. Wasserstein barycenter and its application to texture mixing. In Alfred M. Bruckstein, Bart M. ter Haar Romeny, Alexander M. Bronstein, and Michael M. Bronstein (eds.), *Scale Space and Variational Methods in Computer Vision*, pp. 435–446, Berlin, Heidelberg, 2012. Springer Berlin Heidelberg. ISBN 978-3-642-24785-9.
- S.T. Rachev. *Probability Metrics and the Stability of Stochastic Models*. Wiley Series in Probability and Statistics - Applied Probability and Statistics Section. Wiley, 1991.
- Colin Raffel, Noam Shazeer, Adam Roberts, Katherine Lee, Sharan Narang, Michael Matena, Yanqi Zhou, Wei Li, and Peter J Liu. Exploring the limits of transfer learning with a unified text-to-text transformer. *arXiv preprint arXiv:1910.10683*, 2019.
- Kelly Ramsay, Stéphane Durocher, and Alexandre Leblanc. Integrated rank-weighted depth. *Journal of Multivariate Analysis*, 173:51–69, 2019.
- Peter A Rankel, John Conroy, Hoa Trang Dang, and Ani Nenkova. A decade of automatic content evaluation of news summaries: Reassessing the state of the art. In *Association for Computational Linguistics (ACL)*, pp. 131–136, 2013.
- Peter J. Rousseeuw and Mia Hubert. Regression depth. *Journal of the American Statistical Association*, 94(446):388–402, 1999.
- Peter J. Rousseeuw and Mia Hubert. Anomaly detection by robust statistics. *WIREs Data Mining and Knowledge Discovery*, 8(2):1236, 2018.
- Peter J. Rousseeuw and Ida Rutz. The depth function of a population distribution. *Metrika*, 49(3):213–244, 1999.
- Peter J. Rousseeuw and Anja Struyf. Computing location depth and regression depth in higher dimensions. *Statistics and Computing*, 8(3):193–203, 1998.
- Alfréd Rényi. On measures of entropy and information. In *Proceedings of the 4th Berkeley Symposium on Mathematical Statistics and Probability, Volume 1: Contributions to the Theory of Statistics*, pp. 547–561, Berkeley, Calif., 1961. University of California Press.
- Geoffrey Schiebinger, Jian Shu, Marcin Tabaka, Brian Cleary, Vidya Subramanian, Aryeh Solomon, Joshua Gould, Siyan Liu, Stacie Lin, Peter Berube, Lia Lee, Jenny Chen, Justin Brumbaugh, Philippe Rigollet, Konrad Hochedlinger, Rudolf Jaenisch, Aviv Regev, and Eric S. Lander. Optimal-transport analysis of single-cell gene expression identifies developmental trajectories in reprogramming. *Cell*, 176(4):928–943.e22, 2019.
- Rolf Schneider. *Convex Bodies: The Brunn-Minkowski Theory*. Cambridge University Press, Cambridge, 1993.
- Abigail See, Peter J Liu, and Christopher D Manning. Get to the point: Summarization with pointer-generator networks. *arXiv preprint arXiv:1704.04368*, 2017.
- Robert Serfling. Depth functions in nonparametric multivariate inference. *DIMACS Series in Discrete Mathematics and Theoretical Computer Science*, 72, 2006.
- C. E. Shannon. A mathematical theory of communication. *The Bell System Technical Journal*, 27(3):379–423, 1948.
- J. Shi and J. Malik. Normalized cuts and image segmentation. *IEEE Transactions on Pattern Analysis & Machine Intelligence*, 22(08):888–905, 2000.

- Matthew Snover, Bonnie Dorr, Richard Schwartz, Linnea Micciulla, and John Makhoul. A study of translation edit rate with targeted human annotation. In *Proceedings of the 7th Conference of the Association for Machine Translation in the Americas: Technical Papers*, pp. 223–231, 2006.
- Lucia Specia, Dhvaj Raj, and Marco Turchi. Machine translation evaluation versus quality estimation. *Machine translation*, 24(1):39–50, 2010.
- Bharath K. Sriperumbudur, Kenji Fukumizu, Arthur Gretton, Bernhard Schölkopf, and Gert R. G. Lanckriet. On the empirical estimation of integral probability metrics. *Electronic Journal of Statistics*, 6:1550 – 1599, 2012.
- Guillaume Staerman. *Functional anomaly detection and robust estimation*. PhD thesis, Institut polytechnique de Paris, 2022.
- Guillaume Staerman, Pavlo Mozharovskyi, and Stéphan Cléménçon. The area of the convex hull of sampled curves: a robust functional statistical depth measure. In *Proceedings of the 23rd International Conference on Artificial Intelligence and Statistics*, volume 108, pp. 570–579, 2020.
- Guillaume Staerman, Pierre Laforgue, Pavlo Mozharovskyi, and Florence d’Alché Buc. When ot meets mom: Robust estimation of wasserstein distance. In *Proceedings of The 24th International Conference on Artificial Intelligence and Statistics*, volume 130, pp. 136–144, 2021a.
- Guillaume Staerman, Pavlo Mozharovskyi, and Stéphan Cléménçon. Affine-invariant integrated rank-weighted depth: Definition, properties and finite sample analysis. *arXiv preprint arXiv:2106.11068*, 2021b.
- Werner. A. Stahel. Breakdown of covariance estimators. Technical report, Fachgruppe für Statistik, ETH, Zürich, 1981.
- Peter Stanchev, Weiyue Wang, and Hermann Ney. Eed: Extended edit distance measure for machine translation. In *Proceedings of the Fourth WMT (Volume 2: Shared Task Papers, Day 1)*, pp. 514–520, 2019.
- Wolfgang Stummer and Igor Vajda. On bregman distances and divergences of probability measures. *IEEE Transactions on Information Theory*, 58(3):1277 – 1288, 2012.
- John W. Tukey. Mathematics and the picturing of data. In R.D. James (ed.), *Proceedings of the International Congress of Mathematicians*, volume 2, pp. 523–531. Canadian Mathematical Congress, 1975.
- Cedric Villani. *Topics in Optimal Transportation*. Graduate Studies in Mathematics Series. American Mathematical Society, New York, 2003.
- Danqing Wang, Pengfei Liu, Yining Zheng, Xipeng Qiu, and Xuanjing Huang. Heterogeneous graph neural networks for extractive document summarization. *arXiv preprint arXiv:2004.12393*, 2020.
- Weiyue Wang, Jan-Thorsten Peter, Hendrik Rosendahl, and Hermann Ney. Character: Translation edit rate on character level. In *Proceedings of the First WMT: Volume 2, Shared Task Papers*, pp. 505–510, 2016.
- Tsung-Hsien Wen, Milica Gašić, Nikola Mrkšić, Pei-Hao Su, David Vandyke, and Steve Young. Semantically conditioned LSTM-based natural language generation for spoken dialogue systems. In *Proceedings of the 2015 Conference on Empirical Methods in Natural Language Processing*, pp. 1711–1721, 2015.
- Wojciech Witon, Pierre Colombo, Ashutosh Modi, and Mubbasir Kapadia. Disney at iest 2018: Predicting emotions using an ensemble. In *Proceedings of the 9th Workshop on Computational Approaches to Subjectivity, Sentiment and Social Media Analysis*, pp. 248–253, 2018.
- Thomas Wolf, Lysandre Debut, Victor Sanh, Julien Chaumond, Clement Delangue, Anthony Moi, Pierric Cistac, Tim Rault, Rémi Louf, Morgan Funtowicz, et al. Huggingface’s transformers: State-of-the-art natural language processing. *arXiv preprint arXiv:1910.03771*, 2019.
- Wonjin Yoon, Yoon Sun Yeo, Minbyul Jeong, Bong-Jun Yi, and Jaewoo Kang. Learning by semantic similarity makes abstractive summarization better. *arXiv preprint arXiv:2002.07767*, 2020.

- Jingqing Zhang, Yao Zhao, Mohammad Saleh, and Peter Liu. Pegasus: Pre-training with extracted gap-sentences for abstractive summarization. In *Proceedings of the 37th International Conference on Machine Learning*, volume 119, pp. 11328–11339, 2020.
- Tianyi Zhang, Varsha Kishore, Felix Wu, Kilian Q Weinberger, and Yoav Artzi. Bertscore: Evaluating text generation with bert. *arXiv preprint arXiv:1904.09675*, 2019.
- Wei Zhao, Maxime Peyrard, Fei Liu, Yang Gao, Christian M Meyer, and Steffen Eger. Moverscore: Text generation evaluating with contextualized embeddings and earth mover distance. *arXiv preprint arXiv:1909.02622*, 2019.
- Ming Zhong, Pengfei Liu, Danqing Wang, Xipeng Qiu, and Xuanjing Huang. Searching for effective neural extractive summarization: What works and what’s next. *arXiv preprint arXiv:1907.03491*, 2019.
- Ming Zhong, Pengfei Liu, Yiran Chen, Danqing Wang, Xipeng Qiu, and Xuanjing Huang. Extractive summarization as text matching. *arXiv preprint arXiv:2004.08795*, 2020.
- Qingyu Zhou, Nan Yang, Furu Wei, Shaohan Huang, Ming Zhou, and Tiejun Zhao. Neural document summarization by jointly learning to score and select sentences. *arXiv preprint arXiv:1807.02305*, 2018.
- Zuo. Projected based depth functions and associated medians. *The annals of statistics*, 31(5):1460–1490, 2003.
- B.Y. Zuo and R. Serfling. General notions of statistical depth function. *The Annals of Statistics*, 28(2): 461–482, 2000.

## Appendix

This Appendix is organized as follows:

- Appendix A contains additional notations as well as useful preliminary results.
- Appendix B contains the proofs of the propositions/theorems provided in the paper.
- Appendix C contains approximation algorithms to compute halfspace/projection/AI-IRW depth.
- Appendix D contains additional synthetic experiments.
- Appendix E contains details on experimental settings of NLP applications.

## A Preliminary Results

First, we introduce additional notations and recall some lemmas, used in the subsequent proofs.

### A.1 Hausdorff Distance

The Hausdorff distance between two bounded subspaces  $\mathcal{K}_1, \mathcal{K}_2$  of  $\mathbb{R}^d$  is defined as:

$$d_{\mathcal{H}}(\mathcal{K}_1, \mathcal{K}_2) = \max \left\{ \sup_{x \in \mathcal{K}_1} \inf_{y \in \mathcal{K}_2} \|x - y\|, \sup_{y \in \mathcal{K}_2} \inf_{x \in \mathcal{K}_1} \|x - y\| \right\}.$$

Furthermore, if  $\mathcal{K}_1$  and  $\mathcal{K}_2$  are convex bodies, i.e. non empty compact convex sets, the Hausdorff distance can be reformulated with support functions of  $\mathcal{K}_1, \mathcal{K}_2$ :

$$d_{\mathcal{H}}(\mathcal{K}_1, \mathcal{K}_2) = \sup_{u \in \mathbb{S}^{d-1}} |h_{\mathcal{K}_1}(u) - h_{\mathcal{K}_2}(u)|,$$

where  $h_{\mathcal{K}_1}(u) = \sup\{\langle u, x \rangle, x \in \mathcal{K}_1\}$ .



## A.2 Quantile Regions

Let  $u \in \mathbb{S}^{d-1}$  and  $X \sim \mu$  where  $\mu \in \mathcal{M}_1(\mathcal{X})$  with  $\mathcal{X} \subset \mathbb{R}^d$ . We define the  $(1 - \beta)$  directional quantile of a distribution  $\mu$  in the direction  $u$  as:

$$q_{\mu,u}^{1-\beta} = \inf \{t \in \mathbb{R} : \mathbb{P}(\langle u, X \rangle \leq t) \geq 1 - \beta\},$$

and the upper  $(1 - \beta)$  quantile set of  $\mu$ :

$$Q_{\mu}^{1-\beta} = \{x \in \mathbb{R}^d : \langle u, x \rangle \leq q_{\mu,u}^{1-\beta}, \quad \forall u \in \mathbb{S}^{d-1}\}.$$

## A.3 Auxiliary Results

We now recall useful results, so as to characterize the halfspace depth regions.

**Lemma A.1** (Brunel, 2019, Lemma 1). *Let  $\mu \in \mathcal{M}_1(\mathcal{X})$ , for any  $\beta \in (0, 1)$ , it holds:  $D_{\mu}^{\beta} = Q_{\mu}^{1-\beta}$ .*

**Lemma A.2** (Brunel, 2019, Proposition 1). *Let  $\mu \in \mathcal{M}_1(\mathcal{X})$  with a  $(1 - \beta)$  directional quantile  $q_{\mu,u}^{1-\beta}$  for any  $u \in \mathbb{S}^{d-1}$ . Assume that  $u \mapsto q_{\mu,u}^{1-\beta}$  are sublinear, i.e.,  $q_{\mu,u+\lambda v}^{1-\beta} \leq q_{\mu,u}^{1-\beta} + \lambda q_{\mu,v}^{1-\beta}$ ,  $\forall \lambda > 0$ . Then for any  $u \in \mathbb{S}^{d-1}$ , it holds  $h_{Q_{\mu,u}^{1-\beta}}(u) = q_{\mu,u}^{1-\beta}$ .*

**Lemma A.3.** *Let  $d = 1$  and  $X^1 \sim \mu_1$ ,  $Y^1 \sim \nu_1$  be two random variables where  $\mu_1, \nu_1$  are univariate probability distributions. Denoting by  $F_{X^1}^{-1}$  the quantile function of  $X^1$ , then the depth-trimmed region based pseudo-metric (associated with the halfspace depth) is defined as*

$$DR_{p,\varepsilon}^p(\mu_1, \nu_1) = 2 \int_{\varepsilon/2}^{1/2} \max \left\{ |F_{X^1}^{-1}(q) - F_{Y^1}^{-1}(q)|^p, |F_{X^1}^{-1}(1-q) - F_{Y^1}^{-1}(1-q)|^p \right\} dq.$$

*Proof.* In dimension one, the halfspace depth of any  $t \in \mathbb{R}$  w.r.t.  $\mu_1$  and  $\nu_1$  boils down to

$$D(t, \mu_1) = \min \left\{ F_{X^1}(t), 1 - F_{X^1}(t) \right\} \quad \text{and} \quad D(t, \nu_1) = \min \left\{ F_{Y^1}(t), 1 - F_{Y^1}(t) \right\},$$

and for any  $\gamma \in [0, 1]$ , its upper-level sets to intervals

$$D_{\mu_1}^{\gamma} = [F_{X^1}^{-1}(\gamma), F_{X^1}^{-1}(1 - \gamma)] \quad \text{and} \quad D_{\nu_1}^{\gamma} = [F_{Y^1}^{-1}(\gamma), F_{Y^1}^{-1}(1 - \gamma)]. \quad (5)$$

Now, the quantile function  $\alpha(\beta, \cdot)$  can be explicitly derived as function of  $\beta \in [0, 1]$ :

$$\begin{aligned} \alpha(\beta, \mu_1) &= \sup \left\{ \gamma \in [0, 1] : \mu_1 \left( [F_{X^1}^{-1}(\gamma), F_{X^1}^{-1}(1 - \gamma)] \right) \geq \beta \right\} \\ &= \sup \left\{ \gamma \in [0, 1] : 1 - 2\gamma \geq \beta \right\} \\ &= \frac{1 - \beta}{2}. \end{aligned}$$

Following the same reasoning, it holds  $\alpha(\beta, \nu_1) = \frac{1 - \beta}{2}$ . Further, by change of variables

$$\int_0^{1-\varepsilon} d_{\mathcal{H}} \left( D_{\mu_1}^{(1-\beta)/2}, D_{\nu_1}^{(1-\beta)/2} \right)^p d\beta = 2 \int_{\varepsilon/2}^{1/2} d_{\mathcal{H}} \left( D_{\mu_1}^q, D_{\nu_1}^q \right)^p dq.$$

Combining (5) and the Hausdorff distance definition recalled in Section A.1 lead to the result.  $\square$

## B Technical Proofs

We now prove the main results stated in the paper.

### B.1 Proof of Proposition 3.4

For any  $0 \leq \beta \leq 1 - \varepsilon$  with  $\varepsilon \in (0, 1]$ , and any  $\mu \in \mathcal{M}_1(\mathcal{X})$ ,  $\nu \in \mathcal{M}_1(\mathcal{Y})$ ,  $D_\mu^{\alpha(\beta)}$ ,  $D_\nu^{\alpha(\beta)}$  are non-empty compact subsets of  $\mathbb{R}^d$  due to the properties **(D2-D3)**. The Hausdorff distance  $d_{\mathcal{H}}$ , recalled in Section A.1, is known to be a distance on the space of non-empty compact sets which implies that  $DR_{p,\varepsilon}$  satisfies positivity, symmetry and the triangle inequality (thanks to Minkowski inequality). If  $\mu = \nu$  then  $D_\mu^{\alpha(\beta)} = D_\nu^{\alpha(\beta)}$ ,  $\forall \beta \in [0, 1 - \varepsilon]$  which leads to  $DR_{p,\varepsilon}(\mu, \nu) = 0$ . The reverse is not true.  $DR_{p,\varepsilon}(\mu, \nu) = 0$  implies  $D_\mu^{\alpha(\beta)} = D_\nu^{\alpha(\beta)}$ ,  $\forall \beta \in [0, 1 - \varepsilon]$  that not leads to  $\mu = \nu$ . Indeed, convex depth regions do not characterize probability distributions in general (see Nagy, 2019 for the halfspace depth) that would be the first step in order to prove the previous entailment.

### B.2 Proof of Proposition 3.5

Let  $A \in \mathbb{R}^{d \times d}$  be a non-singular matrix and  $b \in \mathbb{R}^d$  such that  $g : x \mapsto Ax + b$ . Then, it holds:

$$\begin{aligned} DR_{p,\varepsilon}^p(g_\# \mu, g_\# \nu) &= \int_0^{1-\varepsilon} \left[ d_{\mathcal{H}}(D_{g_\# \mu}^{\alpha(\beta)}, D_{g_\# \nu}^{\alpha(\beta)}) \right]^p d\beta \\ &\stackrel{(i)}{=} \int_0^{1-\varepsilon} \left[ d_{\mathcal{H}}(AD_\mu^{\alpha(\beta)} + b, AD_\nu^{\alpha(\beta)} + b) \right]^p d\beta, \end{aligned} \quad (6)$$

where (i) holds because any data depth satisfies **(D1)** by definition. Furthermore,

$$\begin{aligned} d_{\mathcal{H}}(AD_\mu^{\alpha(\beta)} + b, AD_\nu^{\alpha(\beta)} + b) &= \max \left\{ \sup_{x \in D_\mu^{\alpha(\beta)}} \inf_{y \in D_\nu^{\alpha(\beta)}} \|Ax - Ay\|, \sup_{y \in D_\nu^{\alpha(\beta)}} \inf_{x \in D_\mu^{\alpha(\beta)}} \|Ax - Ay\| \right\} \\ &\stackrel{(ii)}{=} \max \left\{ \sup_{x \in D_\mu^{\alpha(\beta)}} \inf_{y \in D_\nu^{\alpha(\beta)}} \|x - y\|, \sup_{y \in D_\nu^{\alpha(\beta)}} \inf_{x \in D_\mu^{\alpha(\beta)}} \|x - y\| \right\} \\ &= d_{\mathcal{H}}(D_\mu^{\alpha(\beta)}, D_\nu^{\alpha(\beta)}), \end{aligned}$$

where (ii) holds by virtue of hypothesis  $AA^\top = I_d$ . Replacing it in (6) yields the desired results.

### B.3 Proof of Proposition 3.6

**First assertion.** Denote  $Z_1, Z_2$  two random variables following  $\mu^*, \nu^*$  respectively. Assume that  $X, Y, Z_1, Z_2$  are defined on the probability space  $(\Omega, \mathcal{A}, \mathbb{P})$ . For any  $x \in \mathbb{R}^d$  and  $\beta \in [0, 1 - \varepsilon]$ ,

$$\begin{aligned} x \in D_\mu^{\alpha(\beta)} &\iff HD_\mu(x) \geq \alpha(\beta) \iff \forall u \in \mathbb{S}^{d-1}, \mathbb{P}(\langle u, X \rangle \leq \langle u, x \rangle) \geq \alpha(\beta) \\ &\iff \forall u \in \mathbb{S}^{d-1}, \mathbb{P}(\langle u, Z_1 + \mathbf{m}_1 \rangle \leq \langle u, x \rangle) \geq \alpha(\beta) \\ &\iff \forall u \in \mathbb{S}^{d-1}, \mathbb{P}(\langle u, Z_1 \rangle \leq \langle u, x - \mathbf{m}_1 \rangle) \geq \alpha(\beta) \\ &\iff x - \mathbf{m}_1 \in D_{\mu^*}^{\alpha(\beta)}. \end{aligned}$$

The same reasoning holds for  $\nu$  and  $\nu^*$ . Following this, for any  $\beta \in [0, 1 - \varepsilon]$  and  $u \in \mathbb{S}^{d-1}$ , it holds:

$$h_{D_\mu^{\alpha(\beta)}}(u) = h_{D_{\mu^*}^{\alpha(\beta)}}(u) - \langle u, \mathbf{m}_1 \rangle \quad \text{and} \quad h_{D_\nu^{\alpha(\beta)}}(u) = h_{D_{\nu^*}^{\alpha(\beta)}}(u) - \langle u, \mathbf{m}_2 \rangle.$$

Thus it holds:

$$\begin{aligned}
DR_{2,\varepsilon}^2(\mu, \nu) &= \int_0^{1-\varepsilon} \sup_{u \in \mathbb{S}^{d-1}} \left| h_{D_{\mu^*}^{\alpha(\beta)}}(u) - \langle u, \mathbf{m}_1 \rangle - h_{D_{\nu^*}^{\alpha(\beta)}}(u) + \langle u, \mathbf{m}_2 \rangle \right|^2 d\beta \\
&\leq \sup_{u \in \mathbb{S}^{d-1}} |\langle u, \mathbf{m}_1 - \mathbf{m}_2 \rangle|^2 + \int_0^{1-\varepsilon} \sup_{u \in \mathbb{S}^{d-1}} |h_{D_{\mu^*}^{\alpha(\beta)}}(u) - h_{D_{\nu^*}^{\alpha(\beta)}}(u)|^2 d\beta \\
&\quad + 2 \sup_{u \in \mathbb{S}^{d-1}} |\langle u, \mathbf{m}_1 - \mathbf{m}_2 \rangle| \int_0^{1-\varepsilon} \sup_{u \in \mathbb{S}^{d-1}} |h_{D_{\mu^*}^{\alpha(\beta)}}(u) - h_{D_{\nu^*}^{\alpha(\beta)}}(u)| d\beta \\
&= \|\mathbf{m}_1 - \mathbf{m}_2\|^2 + DR_{2,\varepsilon}^2(\mu^*, \nu^*) + 2\|\mathbf{m}_1 - \mathbf{m}_2\| DR_{1,\varepsilon}(\mu^*, \nu^*). \tag{7}
\end{aligned}$$

On the other side, we have:

$$\begin{aligned}
DR_{2,\varepsilon}^2(\mu, \nu) &\geq \sup_{u \in \mathbb{S}^{d-1}} |\langle u, \mathbf{m}_1 - \mathbf{m}_2 \rangle|^2 + \int_0^{1-\varepsilon} \sup_{u \in \mathbb{S}^{d-1}} |h_{D_{\mu^*}^{\alpha(\beta)}}(u) - h_{D_{\nu^*}^{\alpha(\beta)}}(u)|^2 d\beta \\
&\quad - 2 \sup_{u \in \mathbb{S}^{d-1}} |\langle u, \mathbf{m}_1 - \mathbf{m}_2 \rangle| \int_0^{1-\varepsilon} \sup_{u \in \mathbb{S}^{d-1}} |h_{D_{\mu^*}^{\alpha(\beta)}}(u) - h_{D_{\nu^*}^{\alpha(\beta)}}(u)| d\beta \\
&= \|\mathbf{m}_1 - \mathbf{m}_2\|^2 + DR_{2,\varepsilon}^2(\mu^*, \nu^*) - 2\|\mathbf{m}_1 - \mathbf{m}_2\| DR_{1,\varepsilon}(\mu^*, \nu^*). \tag{8}
\end{aligned}$$

Combining (7) and (8) lead to the desired result.

**Second assertion.** For any  $u \in \mathbb{S}^{d-1}$ , the  $(1 - \alpha(\beta))$  quantiles of random variables  $\langle u, X \rangle$  and  $\langle u, Y \rangle$  such that  $\langle u, X \rangle \sim \mathcal{N}(\langle u, \mathbf{m}_1 \rangle, u^\top \Sigma_1 u)$  and  $\langle u, Y \rangle \sim \mathcal{N}(\langle u, \mathbf{m}_2 \rangle, u^\top \Sigma_2 u)$  are defined by

$$q_{\mu,u}^{1-\alpha(\beta)} = \langle u, \mathbf{m}_1 \rangle + \Phi^{-1}(1 - \alpha(\beta)) \sqrt{u^\top \Sigma_1 u} \quad q_{\nu,u}^{1-\alpha(\beta)} = \langle u, \mathbf{m}_2 \rangle + \Phi^{-1}(1 - \alpha(\beta)) \sqrt{u^\top \Sigma_2 u},$$

where  $\Phi$  is the cumulative distribution function of the univariate standard Gaussian distribution. Now, to apply Lemma A.2, it is sufficient to prove that directional quantiles are sublinear. It holds using subadditivity of the square root function. Indeed, for any  $u, v \in \mathbb{S}^{d-1}$  and  $\lambda > 0$ , we have:

$$\begin{aligned}
\langle u + \lambda v, \mathbf{m}_1 \rangle + \Phi^{-1}(1 - \alpha(\beta)) \sqrt{(u + \lambda v)^\top \Sigma_1 (u + \lambda v)} &= \langle u, \mathbf{m}_1 \rangle + \lambda \langle v, \mathbf{m}_1 \rangle + \Phi^{-1}(1 - \alpha(\beta)) \sqrt{(u + \lambda v)^\top \Sigma_1 (u + \lambda v)} \\
&\leq \langle u, \mathbf{m}_1 \rangle + \lambda \langle v, \mathbf{m}_1 \rangle + \Phi^{-1}(1 - \alpha(\beta)) \left[ \sqrt{u^\top \Sigma_1 u} + \lambda \sqrt{v^\top \Sigma_1 v} \right] \\
&= q_{\mu,u}^{1-\alpha(\beta)} + \lambda q_{\mu,v}^{1-\alpha(\beta)}.
\end{aligned}$$

The same reasoning holds for  $\nu$ . Applying Lemma A.1 and Lemma A.2, for any  $u \in \mathbb{S}^{d-1}$ , we have  $h_{D_{\mu}^{\alpha(\beta)}}(u) = q_{\mu,u}^{1-\alpha(\beta)}$  and  $h_{D_{\nu}^{\alpha(\beta)}}(u) = q_{\nu,u}^{1-\alpha(\beta)}$ . It follows:

$$\begin{aligned}
DR_{1,\varepsilon}(\mu, \nu) &= \int_0^{1-\varepsilon} d_{\mathcal{H}}(D_{\mu}^{\alpha(\beta)}, D_{\nu}^{\alpha(\beta)}) d\beta = \int_0^{1-\varepsilon} \sup_{u \in \mathbb{S}^{d-1}} |h_{D_{\mu}^{\alpha(\beta)}}(u) - h_{D_{\nu}^{\alpha(\beta)}}(u)| d\beta \\
&= \int_0^{1-\varepsilon} \sup_{u \in \mathbb{S}^{d-1}} \left| \langle u, \mathbf{m}_1 - \mathbf{m}_2 \rangle + \Phi^{-1}(1 - \alpha(\beta)) \left[ \sqrt{u^\top \Sigma_1 u} - \sqrt{u^\top \Sigma_2 u} \right] \right| d\beta \\
&\leq \|\mathbf{m}_1 - \mathbf{m}_2\| + \int_0^{1-\varepsilon} \sup_{u \in \mathbb{S}^{d-1}} \left| \Phi^{-1}(1 - \alpha(\beta)) \left[ \sqrt{u^\top \Sigma_1 u} - \sqrt{u^\top \Sigma_2 u} \right] \right| d\beta \\
&= \|\mathbf{m}_1 - \mathbf{m}_2\| + C_{\varepsilon} \sup_{u \in \mathbb{S}^{d-1}} \left| \sqrt{u^\top \Sigma_1 u} - \sqrt{u^\top \Sigma_2 u} \right|,
\end{aligned}$$

with  $C_{\varepsilon} = \int_0^{1-\varepsilon} |\Phi^{-1}(1 - \alpha(\beta))| d\beta$ . The lower bound is obtained by means the same reasoning. Notice that

$$\|\mathbf{m}_1 - \mathbf{m}_2\| = \sup_{u \in \mathbb{S}^{d-1}} |\langle u, \mathbf{m}_1 - \mathbf{m}_2 \rangle| = \int_0^{1-\varepsilon} \sup_{u \in \mathbb{S}^{d-1}} |\langle u, \mathbf{m}_1 - \mathbf{m}_2 \rangle| d\beta.$$

Introducing  $h_{D_\mu^{\alpha(\beta)}}(u)$ ,  $h_{D_\nu^{\alpha(\beta)}}(u)$  and using triangular inequality, subadditivity of the supremum and linearity of the integral, we obtain:

$$\|\mathbf{m}_1 - \mathbf{m}_2\| \leq DR_{1,\varepsilon}(\mu, \nu) + C_\varepsilon \sup_{u \in \mathbb{S}^{d-1}} |\sqrt{u^\top \Sigma_1 u} - \sqrt{u^\top \Sigma_2 u}|,$$

which ends the proof.

#### B.4 Proof of Proposition 3.7

For  $DR_{p,\varepsilon}$  to break down at  $\mathcal{S}_n$ , it needs to have at least one trimmed-region that breaks down. Then the breakdown point of  $DR_{p,\varepsilon}$  is higher than the minimum of the breakdown point of each region. Indeed, we have

$$\begin{aligned} BP(DR_{p,\varepsilon}, \mathcal{S}_n) &= \min \left\{ \frac{o}{n+o} : \sup_{Z_1, \dots, Z_o} DR_{p,\varepsilon}(\hat{\mu}_{n+o}, \hat{\mu}_n) = +\infty \right\} \\ &\geq \min_{\beta \in [0, 1-\varepsilon]} \min \left\{ \frac{o}{n+o} : \sup_{Z_1, \dots, Z_o} d_{\mathcal{H}}(D_{\hat{\mu}_{n+o}}^{\alpha(\beta, \hat{\mu}_{n+o})}, D_{\hat{\mu}_n}^{\alpha(\beta, \hat{\mu}_n)}) = +\infty \right\} \\ &= \min_{\beta \in [0, 1-\varepsilon]} BP(D_{\hat{\mu}_n}^{\alpha(\beta, \hat{\mu}_n)}, \mathcal{S}_n). \end{aligned}$$

Now applying Lemma 3.1 in [Donoho & Gasko \(1992\)](#) and Theorem 4 in [Nagy & Dvořák \(2021\)](#), a lower bound of the breakdown point of each halfspace region, for every  $\beta \in [0, 1-\varepsilon]$ , is given by

$$BP(D_{\hat{\mu}_n}^{\alpha(\beta, \hat{\mu}_n)}, \mathcal{S}_n) \geq \begin{cases} \frac{\lceil n\alpha(1-\varepsilon, \hat{\mu}_n)/(1-\alpha(1-\varepsilon, \hat{\mu}_n)) \rceil}{n + \lceil n\alpha(1-\varepsilon, \hat{\mu}_n)/(1-\alpha(1-\varepsilon, \hat{\mu}_n)) \rceil} & \text{if } \alpha(1-\varepsilon, \hat{\mu}_n) \leq \frac{\alpha_{\max}(\hat{\mu}_n)}{1+\alpha_{\max}(\hat{\mu}_n)}, \\ \frac{\alpha_{\max}(\hat{\mu}_n)}{1+\alpha_{\max}(\hat{\mu}_n)} & \text{otherwise,} \end{cases}$$

where  $\alpha_{\max}(\hat{\mu}_n) = \max_{x \in \mathbb{R}^d} HD_{\hat{\mu}_n}(x)$ .

## C Approximation Algorithm

In this part, we display the approximation algorithms of the halfspace depth (see Algorithm 2), the projection depth (see Algorithm 3) and the AI-IRW depth (see Algorithm 4, proposed in [Staerman et al., 2021b](#)) used in the first step of the Algorithm 1.

---

#### Algorithm 2 Approximation of the halfspace depth

---

*Initialization:*  $\mathbf{X} \in \mathbb{R}^{n \times d}$ ,  $K$ .

- 1: Construct  $\mathbf{U} \in \mathbb{R}^{d \times K}$  by sampling uniformly  $K$  vectors  $U_1, \dots, U_K$  in  $\mathbb{S}^{d-1}$
- 2: Compute  $\mathbf{M} = \mathbf{X}\mathbf{U}$
- 3: Compute the rank value  $\sigma(i, k)$ , the rank of index  $i$  in  $\mathbf{M}_{:,k}$  for every  $i \leq n$  and  $k \leq K$
- 4: Set  $D_i = \min_{k \leq K} \sigma(i, k)$  for every  $i \leq n$

**Output:**  $D, \mathbf{M}$

---

**Algorithm 3** Approximation of the projection depth*Initialization:*  $\mathbf{X} \in \mathbb{R}^{n \times d}$ ,  $K$ .

- 1: Construct  $\mathbf{U} \in \mathbb{R}^{d \times K}$  by sampling uniformly  $K$  vectors  $U_1, \dots, U_K$  in  $\mathbb{S}^{d-1}$
- 2: Compute  $\mathbf{M} = \mathbf{X}\mathbf{U}$
- 3: Find  $\mathbf{M}_{\text{med},k}$  the median value of  $\mathbf{M}_{:,k}$ ,  $\forall k \leq K$
- 4: Compute  $\text{MAD}_k = \text{median}\{|\mathbf{M}_{i,k} - \mathbf{M}_{\text{med},k}|, i \leq n\}$  for  $k \leq K$
- 5: Compute  $\mathbf{V}$  s.t.  $\mathbf{V}_{i,k} = |\mathbf{M}_{i,k} - \mathbf{M}_{\text{med},k}|/\text{MAD}_k$
- 6: Set  $D_i = \min_{k \leq K} 1/(1 + \mathbf{V}_{i,k})$  for every  $i \leq n$

**Output:**  $\bar{D}, \mathbf{M}$ **Algorithm 4** Approximation of the AI-IRW depth*Initialization:*  $\mathbf{X} \in \mathbb{R}^{n \times d}$ ,  $K$ .

- 1: Construct  $\mathbf{U} \in \mathbb{R}^{d \times K}$  by sampling uniformly  $K$  vectors  $U_1, \dots, U_K$  in  $\mathbb{S}^{d-1}$
- 2: Compute  $\hat{\Sigma}$  using any estimator
- 3: Perform Cholesky or SVD on  $\hat{\Sigma}$  to obtain  $\hat{\Sigma}^{-1/2}$
- 4: Compute  $\mathbf{V} = \hat{\Sigma}^{-1/2}\mathbf{U}/\|\hat{\Sigma}^{-1/2}\mathbf{U}\|$
- 5: Compute  $\mathbf{M} = \mathbf{X}\mathbf{V}$
- 6: Compute the rank value  $\sigma(i, k)$ , the rank of index  $i$  in  $\mathbf{M}_{:,k}$  for every  $i \leq n$  and  $k \leq K$
- 7: Set  $D_i = \frac{1}{K} \sum_{k=1}^K \sigma(i, k)$  for every  $i \leq n$

**Output:**  $\bar{D}, \mathbf{M}$ **D Additional Experiments****D.1 Illustration of Data Depth Contours**

Figure 6, which plots a family of AI-IRW (using MCD estimator) depth induced trimmed-contours for a dataset contaminated with outliers, illustrates its robustness.

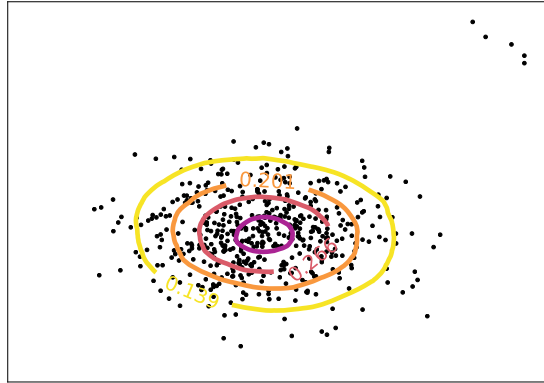

Figure 6: AI-IRW depth contours for a bivariate sample contaminated with outliers.

**D.2 Illustration of the Depth Trimmed-Regions based Pseudo-Metric**

Figure 1, which plots a family of (approximated) AI-IRW depth induced trimmed-regions for two datasets contaminated with outliers, illustrates the key idea of our proposed pseudo-metric.

### D.3 Empirical Analysis of Statistical Rates

This part presents complementary results of those obtained in the Section 5.1. Considering the same experiment as in the core paper, Figures 7 and 8 display the results of the same experiment but with dimension  $d = 5$  and  $d = 10$ , respectively.

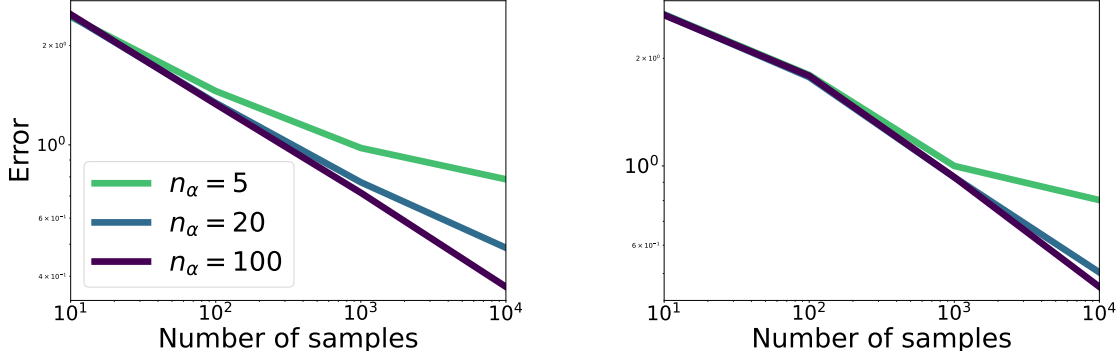

Figure 7: Empirical analysis of statistical convergence rates. Resulting error of the proposed pseudo-metric when increasing the sample size using the projection depth (left) and the halfspace depth (right) for various  $n_\alpha$  parameters with  $d = 5$ .

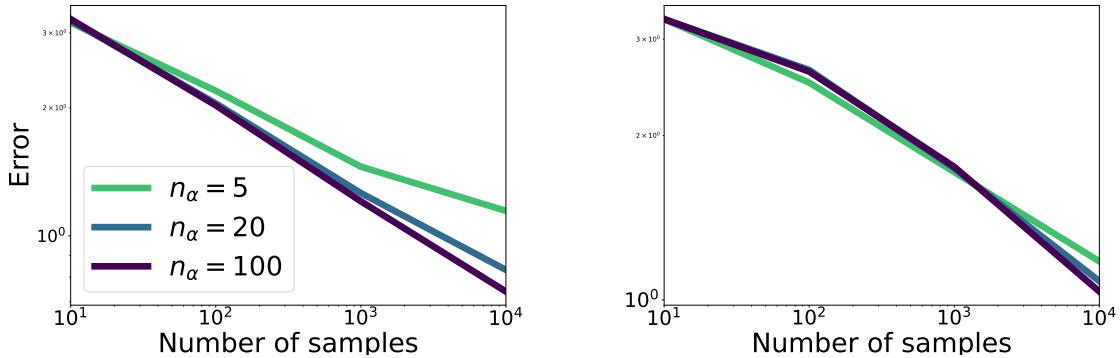

Figure 8: Empirical analysis of statistical convergence rates. Resulting error of the proposed pseudo-metric when increasing the sample size using the projection depth (left) and the halfspace depth (right) for various  $n_\alpha$  parameters with  $d = 10$ .

### D.4 The Influence of the Parameter $\varepsilon$

The parameter  $\varepsilon$  plays the role of the robust tuning parameter of  $DR_{2,\varepsilon}$ . In this part, we complete our theoretical results provided in Section 3.2. We assess the robustness of our pseudo-metric making varying the parameter  $\varepsilon$ . Precisely, we simulate two normal samples  $\mathbf{X}$  and  $\mathbf{Y}$  from two standard Gaussian distributions in dimension two with a sample size of 10000. From that, we construct abnormal samples with a proportion of anomalies equal to  $\{1\%, 10\%, 20\%\}$ . To that end, we choose a proportion of normal samples and replace their first (for  $\mathbf{X}$ ) and second (for  $\mathbf{Y}$ ) coordinates as follows:  $X_{\text{anom}} = 30 + 50Z$  and  $Y_{\text{anom}} = -30 - 50Z$  where  $Z$  follows a uniform distribution on  $[0, 1]$ ; leading to points far from the normal distributions. Thus, we compute  $DR_{2,\varepsilon}$  with both robust and non-robust data depths, i.e. the projection and halfspace depths between  $\mathbf{X}$  and  $\mathbf{Y}$  being used as a benchmark. Further, we compute  $DR_{2,\varepsilon}$  between abnormal samples and report mean error (comparing values obtained between normal samples and values obtained between



abnormal samples; averaged over ten runs) on Figure 9. First, when computing with a robust depth function, we can see that the robustness of the proposed pseudo-metric relies directly on the parameter  $\varepsilon$ . This is shown by the presence of an elbow when the parameter  $\varepsilon$  reaches the level of the proportion of anomalies. In contrast, we can see that for a non-robust depth function such as the halfspace depth, our proposed pseudo-metric becomes non-robust once the abnormal proportion is higher than 1%, leading to a poorly robust depth. This experiment then confirms our theoretical results on the Breakdown Point of  $DR_{p,\varepsilon}$  highlighted in Proposition 3.7. The parameter  $\varepsilon$  provides robustness to our pseudo-metric when combined with a robust depth function.

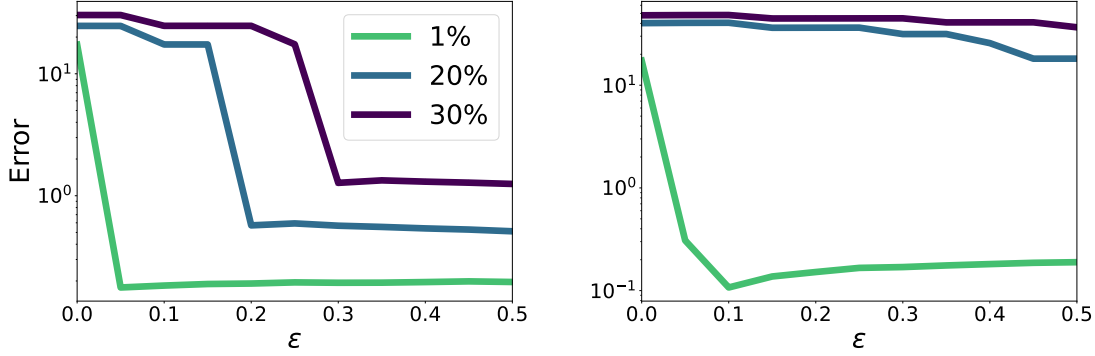

Figure 9: Influence of the parameter  $\varepsilon$  on the robustness of the proposed pseudo-metric with a robust depth function (the projection depth, left) and a non-robust one (the halfspace depth, right) for various proportion of anomalies.

### D.5 The Choice of the Parameter $n_\alpha$

Proposition 3.6 allows to derive a closed form expression for  $DR_{2,\varepsilon}(\mu, \nu)$  when  $\mu, \nu$  are Gaussian distributions with the same variance-covariance matrix. In order to investigate the quality of the approximation on light-tailed and heavy-tailed distributions, we focus on computing  $DR_{2,0.1}$  (with  $K = 500$ ) for varying number of  $n_\alpha$  between a sample of 1000 points stemming from  $\mu \sim \mathcal{N}(\mathbf{0}_d, \Sigma)$  for  $d \in \{2, 3, 10\}$ ,  $\Sigma$  drawn from the Wishart distribution (with parameters  $(d, I_d)$ ) on the space of definite matrices and three different samples (which yields nine settings). These three samples are constructed from 1000 observations stemming from elliptically symmetric *Cauchy*, *Student-t<sub>2</sub>* and *Gaussian* distributions all centered at  $\mathbf{7}_d$ . Results that report the averaged approximation error and the 25-75% empirical quantile intervals are depicted in Figure 10. They show that  $DR_{p,\varepsilon}$  converges slowly for *Cauchy* with growing  $n_\alpha$ , while it converges with small  $n_\alpha$  for *Gaussian* and *Student-t<sub>2</sub>* distributions.

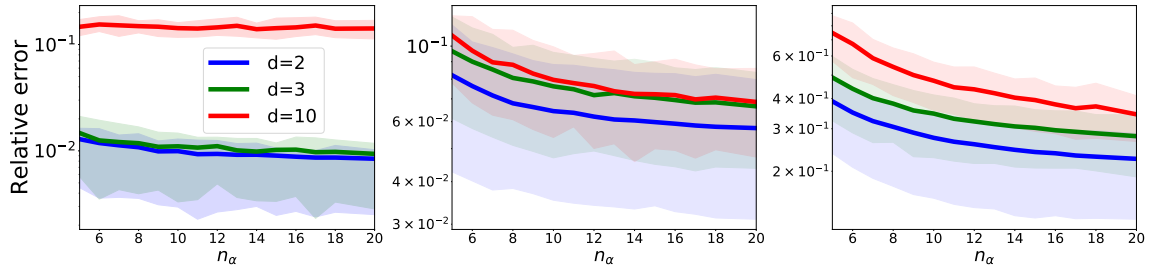

Figure 10: Relative approximation error (averaged over 100 repetitions, y-axis in log scale) of  $DR_{p,\varepsilon}$  for elliptically symmetric *Cauchy* (left), *Student-t<sub>2</sub>* (middle) and *Gaussian* (right) distributions for differing numbers of  $n_\alpha$ .

## D.6 Robustness to Outliers

Datasets on which experiments regarding “Robustness to outlier” in Section 5 have been performed are displayed in Figure 11.

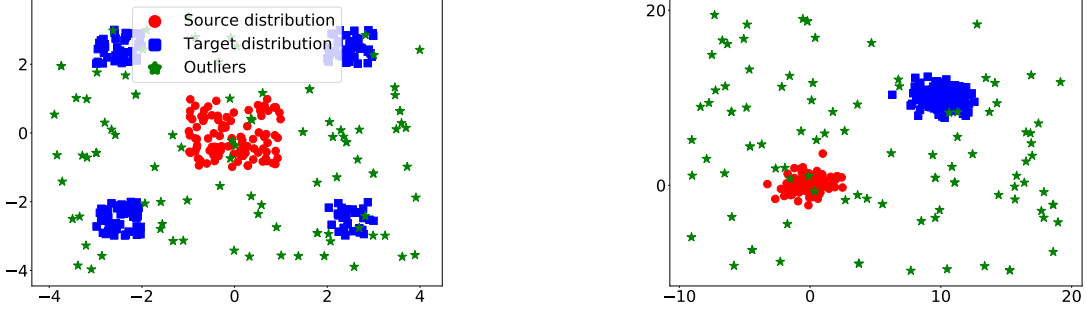

Figure 11: datasets related to robustness experiments depicted in Section 5 with 20% of outliers for *fragmented hypercube* (left) and *Gaussian* (right).

## E Application to NLP

In this section, we gather details on experimental settings and additional results on the automatic evaluation of natural language generation (NLG).

### E.1 Extended related works on Automatic Evaluation of NLG

Many metrics have been recently introduced for the automatic evaluation of text generation. In this work, we rely on untrained metrics. These metrics can be grouped into two categories: string-based metrics that depend on the string representation of the input texts to compute the similarity score and embedding-based metrics that rely on a continuous representation of the texts.

String matching metrics can be divided into two categories: N-gram matching and edit distance-based metrics. Perhaps the most used N-gram matching metrics are BLEU, ROUGE and METEOR. Edit distance-based metrics (e.g. TER; [Snover et al., 2006](#)) measure the distance as the number of basic operations such as ‘edit’/‘delete’/‘insert’. Variants of TER include CHARACTERE ([Wang et al., 2016](#)), CDER ([Leusch et al., 2006](#)), EED ([Stanchev et al., 2019](#)). String-based metrics fail to produce meaningful scores in the case of paraphrases, especially if no common n-grams are found between the candidate and the reference text.

The second category of untrained metrics (namely embedding-based metrics) achieves state-of-the-art performance in many NLG evaluation tasks and has been introduced to address the issues mentioned above. Originally introduced for the widely used words embedding ([Garcia et al., 2019](#); [Colombo et al., 2019](#); [2020](#); [2021b](#)) such as Word2Vec ([Mikolov et al., 2013](#)) or Glove ([Pennington et al., 2014](#)), this class of metrics has leveraged recently introduced contextualized word representations (CWR). CWR such as BERT, ELMO ([Peters et al., 2018](#)), HILAMOD ([Chapuis et al., 2020](#); [2021](#)) or ROBERTA ([Liu et al., 2019b](#)) are popular in NLP ([Witon et al., 2018](#)) as they achieve SOTA performance on many tasks. The two most popular metrics are MoverScore and BertScore.

### E.2 Evaluation

For the task of evaluation of text generation, we assume that we have access to a dataset  $\{T_{R_i}, \{T_{G_i}^j, h(T_{G_i}^j)\}_{j=1}^{n_S}\}_{i=1}^{n_T}$  where  $T_{G_i}^j$  represents the  $i$ -th generated text by the  $j$ -th natural generation system, and  $h(T_{G_i}^j)$  represents score assigned by the human annotator<sup>1</sup> to  $T_{G_i}^j$ , and  $T_{R_i}$  is the reference

<sup>1</sup>In practice an averaged score is considered as each sentence is annotated by 3 different annotators. The considered datasets directly provide the aggregated score.

text.  $n_T$  is the number of available texts, and  $n_S$  is the number of different systems.

To assess the relevance of an evaluation metric  $\mathfrak{M}$ , the correlation with the human judgment is considered one of the most important criteria (Banerjee & Lavie, 2005; Koehn, 2009; Chatzikoumi, 2020). To measure this correlation, two evaluation strategies are commonly adopted and built on top of a classical correlation measure, denoted  $C$ , e.g. Kendall ( $\tau$ ; Kendall, 1938), Pearson ( $r$ ; Leusch et al., 2003) or Spearman ( $\rho$ ; Melamed et al., 2003).

- *The text level correlation* ( $C_{text}$ ) measures the ability of the metric to distinguish between badly and well generated text. Formally,  $C_{text}$  is defined as follows:

$$C_{text} = \frac{1}{N_T} \sum_{i=1}^{n_T} C(\mathbf{M}_i^{text}, \mathbf{H}_i^{text}), \quad (9)$$

$$\mathbf{M}_i^{text} = [\mathfrak{M}(T_{R_i}, T_{C_i}^1), \dots, \mathfrak{M}(T_{R_i}, T_{C_i}^{n_S})],$$

$$\mathbf{H}_i^{text} = [h(T_{C_i}^1), \dots, h(T_{C_i}^{n_S})].$$

- *The system level correlation* ( $C_{sys}$ ) assesses the ability of a metric to distinguish between good and bad systems. Formally,  $C_{sys}$  is defined as follows:

$$C_{sys} = C(\mathbf{M}^{sys}, \mathbf{H}^{sys}), \quad (10)$$

$$\mathbf{M}^{sys} = \left[ \frac{1}{n_T} \sum_{i=1}^{n_T} \mathfrak{M}(T_{R_i}, T_{C_i}^1), \dots, \frac{1}{n_T} \sum_{i=1}^{n_T} \mathfrak{M}(T_{R_i}, T_{C_i}^{n_S}) \right],$$

$$\mathbf{H}^{sys} = \left[ \frac{1}{n_T} \sum_{i=1}^{n_T} h(T_{C_i}^1), \dots, \frac{1}{n_T} \sum_{i=1}^{n_T} h(T_{C_i}^{n_S}) \right],$$

We refer the reader to Bhandari et al. (2020) for further details on the evaluation of text generation.

### E.3 Results on Data2text

In this section, we gather further details and results on data2text automatic evaluation.

#### E.3.1 Task Description

In WebNLG 2020, the goal is to create new efficient generation algorithms that can verbalise knowledge-based fragments. These algorithms are called Knowledge Base Verbalizers (Gardent et al., 2017) and are used during the micro-planning phase of NLG systems (Ferreira et al., 2018). WebNLG has been gathered to be more representative of the progress of recent NLG systems than previously existing task-oriented dialogue datasets (see e.g. SFHOTEL (Wen et al., 2015) and BAGEL (Mairesse et al., 2010)). As previously mentioned for the data2text task we work on the WebNLG2020 challenge (Gardent et al., 2017; Perez-Beltrachini et al., 2016). Data and system performances can be found in <https://webnlg-challenge.loria.fr/>. The task consists in mapping RDF triples to natural language (RDF format is used for many application including FOAF (see <http://www.foaf-project.org/>). For WebNLG 2020, the triplets are extracted from DBpedia (Auer et al., 2007). Data have been made freely available from the authors at [https://gitlab.com/shimorina/webnlg-dataset/-/tree/master/release\\_v3.0](https://gitlab.com/shimorina/webnlg-dataset/-/tree/master/release_v3.0). To compose this dataset, 15 systems (both symbolic and neural-based) have been used. The final dataset is composed of over 3k samples of human annotations (see <https://webnlg-challenge.loria.fr/files/WebNLG-2020-Presentation.pdf> for more details).

**Example:** Given the following triplet (John\_Blaha birthDate 1942\_08\_26) (John\_Blaha birthPlace San\_Antonio) (John\_Blaha job Pilot) the ground-truth reference is John Blaha, born in San Antonio on 1942-08-26, worked as a pilot.

|                      | Correctness |             |             | Data Coverage |             |             | Relevance   |             |             |
|----------------------|-------------|-------------|-------------|---------------|-------------|-------------|-------------|-------------|-------------|
|                      | $r$         | $\tau$      | $\rho$      | $r$           | $\tau$      | $\rho$      | $r$         | $\tau$      | $\rho$      |
| $DR_{p,\varepsilon}$ | <b>89.4</b> | <b>80.0</b> | <b>92.6</b> | <b>84.2</b>   | <u>58.3</u> | <u>72.3</u> | <b>86.2</b> | <u>62.7</u> | <u>72.9</u> |
| Wasserstein          | 86.2        | 73.0        | 86.7        | 80.4          | 45.3        | 62.3        | 83.8        | 51.3        | 67.6        |
| Sliced-Wasserstein   | 86.1        | 73.0        | 85.8        | 80.9          | 45.5        | 60.0        | 82.0        | 51.3        | 68.2        |
| MMD                  | 25.4        | 71.7        | 8.3         | 19.1          | 45.3        | 10.0        | 26.1        | 51.3        | 15.0        |
| BertScore            | <u>85.5</u> | <u>73.3</u> | <u>83.4</u> | <u>74.7</u>   | <u>53.3</u> | <u>68.2</u> | <u>83.3</u> | <u>65.0</u> | <b>79.4</b> |
| MoverScore           | <u>84.1</u> | <u>73.3</u> | <u>84.1</u> | <u>78.7</u>   | <u>53.3</u> | <u>66.2</u> | <u>82.1</u> | <u>65.0</u> | <u>77.4</u> |
| BLEU                 | 77.6        | 60.0        | 66.3        | 55.7          | 36.6        | 50.2        | 63.0        | 51.6        | 65.2        |
| ROUGE-1              | 80.6        | 65.0        | 65.0        | 76.5          | <b>60.3</b> | <b>76.3</b> | 64.3        | 56.7        | 69.2        |
| ROUGE-2              | 73.6        | 58.3        | 63.3        | 54.7          | 35.0        | 43.1        | 62.0        | 46.7        | 60.8        |
| METEOR               | <u>86.5</u> | <u>70.0</u> | 66.3        | <u>77.3</u>   | 46.6        | 50.2        | <u>82.1</u> | 58.6        | 65.2        |
| TER                  | 79.6        | 58.0        | <u>78.3</u> | 69.7          | 38.0        | 58.2        | 75.0        | <b>77.6</b> | <u>70.2</u> |

Table 3: WebNLG 2020 (full results): absolute correlation at the system level with three human judgment criteria. Best overall results are indicated in bold, best results in their group are underlined.

### E.3.2 Results

We gather in Table 3 complete results on the WebNLG tasks including results on ROUGE-2. To compare  $DR_{p,\varepsilon}$  (with  $\varepsilon = 0.01$ ,  $n_\alpha = 5$ ,  $p = 2$ ) with the different metrics (i.e. Wasserstein, Sliced-Wasserstein, MMD), we work on Roberta-based model from the HuggingFace hub (Wolf et al., 2019) and extract representation from the 11th layer. From Table 3, we observe a similar behavior from BertScore and MoverScore. This similarity has also been reported in a different setting in the previous work of Zhao et al. (2019). Overall, we observe that  $DR_{p,\varepsilon}$  is always among its group’s top-scoring metrics and achieves the best overall results on several configurations. It is worth noticing that  $DR_{p,\varepsilon}$  only relies on information available in the candidate and the reference text. In contrast, BertScore and MoverScore use IDF information computed on every dataset.

## E.4 Results on Summarization

In this section, we gather experimental details and results on the automatic evaluation of the text summarization task.

### E.4.1 Task Description

Text summarization has attracted much attention in recent years (Zhang et al., 2020). Two types of models exist: *extractive* and *abstractive*. In extractive summarization, the system copies chunks of informative fragments from the input texts, whereas, in abstractive summarization, the system generates novel words. In this section, we describe our experimental setting. We present the tasks and the baseline metrics used for the automatic evaluation of summarization. We work with the dataset from Bhandari et al. (2020) for this task. This dataset has been introduced to solve several flaws (Rankel et al., 2013) present in existing summarization datasets such as TAC (Dang & Owczarzak, 2008; McNamee & Dang, 2009). The dataset has been annotated using the pyramid score (Nenkova et al., 2007; Nenkova & Passonneau, 2004) and automatically built from the CNN/Daily News (Bhandari et al., 2020). It gathers 11 490 summaries coming from 11 extractive systems (See et al., 2017; Chen & Bansal, 2018; Raffel et al., 2019; Gehrmann et al., 2018; Dong et al., 2019; Liu & Lapata, 2019; Lewis et al., 2019; Yoon et al., 2020) and 14 abstractive systems (Zhou et al., 2018; Narayan et al., 2018; Kedzie et al., 2018; Zhong et al., 2019; Liu & Lapata, 2019; Dong et al., 2019; Wang et al., 2020; Zhong et al., 2020).

**Example:** The goal is to assign a similarity score between a reference text: “*Manchester United take on Manchester City on Sunday. Match will begin at 4 pm local time at United’s Old Trafford home. Police have no objections to kick-off being so late in the afternoon. Last late afternoon weekend kick-off in the Manchester*”

|                      | Abstractive        |                    |             | Extractive  |             |             |
|----------------------|--------------------|--------------------|-------------|-------------|-------------|-------------|
|                      | $r$                | $\tau$             | $\rho$      | $r$         | $\tau$      | $\rho$      |
| $DR_{p,\varepsilon}$ | <b><u>72.1</u></b> | <b><u>72.1</u></b> | <u>70.1</u> | <u>91.5</u> | <b>91.5</b> | <u>69.2</u> |
| Wasserstein          | 71.0               | 70.4               | <u>71.1</u> | 74.2        | 74.2        | 40.0        |
| Sliced-Wasserstein   | 70.1               | 68.7               | 71.0        | 72.4        | 73.9        | 69.2        |
| MMD                  | 68.2               | 67.5               | 67.9        | 75.6        | 75.6        | 56.1        |
| BertScore            | 71.7               | <u>71.9</u>        | 72.0        | 70.9        | 72.9        | <b>73.8</b> |
| MoverScore           | 72.4               | <u>71.9</u>        | <u>73.0</u> | <u>76.1</u> | <u>76.1</u> | 47.4        |
| ROUGE-1              | <b>73.5</b>        | 73.0               | <b>74.4</b> | 72.2        | <u>74.0</u> | <u>69.1</u> |
| ROUGE-2              | 73.0               | <b>73.5</b>        | 73.0        | 55.1        | 53.2        | <u>69.1</u> |
| JS-2                 | 68.9               | 6.8                | 69.8        | <b>92.9</b> | 5.5         | 19.0        |

Table 4: Summarization: absolute correlation coefficients (using Pearson ( $r$ ), Spearman ( $\rho$ ) and Kendall ( $\tau$ ) coefficient) between different metrics on text summarization. Best overall results are indicated in bold, best results in their group are underlined.

*derby saw 34 fans arrested at Wembley in 2011 fa cup semi-final” and the text generated by a NLG system: “Manchester Derby takes place at Old Trafford on Sunday afternoon police have no objections to the late afternoon kick-off both sides are challenging for a top-four spot in the Premier League the man in charge of patrolling the sell-out clash has no such fears”.*

#### E.4.2 Results

We gather in Table 4, the results on the summarization task. We use a bert-based uncased model and rely on the representations extracted from the 9th layer (similarly to BertScore). For this experiment the following parameters are used:  $\varepsilon = 0.01$ ,  $n_\alpha = 5$ ,  $p = 2$ . For this task, we can reproduce results from Bhandari et al. (2020) where the different behavior regarding the extractive and the abstractive systems is also observed. In this experiment, we observe that  $DR_{p,\varepsilon}$  can achieve stronger results than other metrics based on Wasserstein, Sliced-Wasserstein and MMD. We also observe that  $DR_{p,\varepsilon}$  outperforms MoverScore and BertScore on extractive systems (on  $r$  and  $\tau$ ). We believe these results support our approach.
